# Supplementary material for: Iridium oxide nanoribbons with metastable monoclinic phase for highly efficient electrocatalytic oxygen evolution
Source: PubMed Central journal article supplement (PMC9985653; doi:10.1038/s41467-023-36833-1), 2023-03-04
Supplement: 41467_2023_36833_MOESM1_ESM.pdf [file 41467_2023_36833_MOESM1_ESM.pdf]

# 1 Supplementary Figures

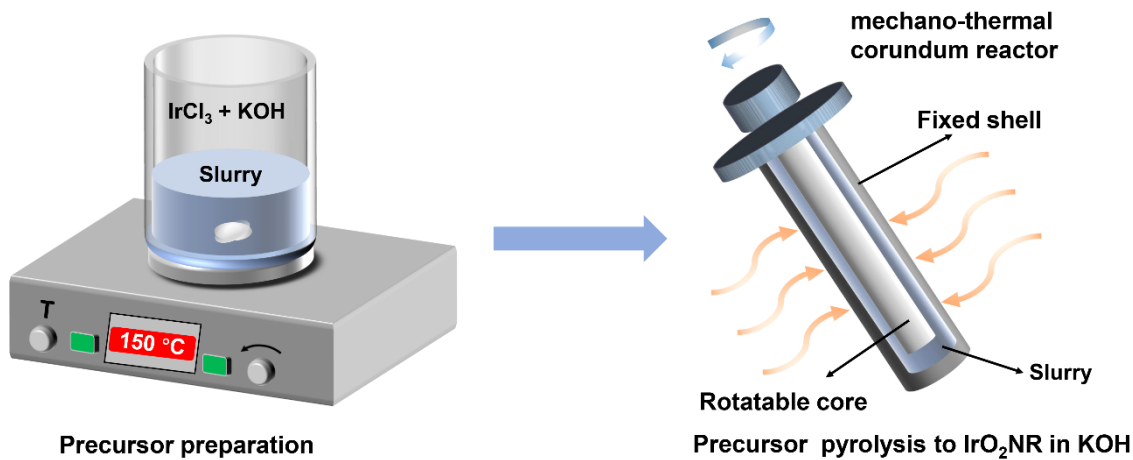

3 **Supplementary Figure 1. The schematic molten-alkali mechanochemical reaction for**  
4 **synthesizing  $\text{IrO}_2\text{NR}$ .** The slurry of  $\text{IrCl}_3$  and KOH aqueous solution was transformed into a homemade  
5 mechano-thermal corundum reactor that was fixed in a muffle furnace. The reactor was heated to different  
6 temperatures to obtain samples.

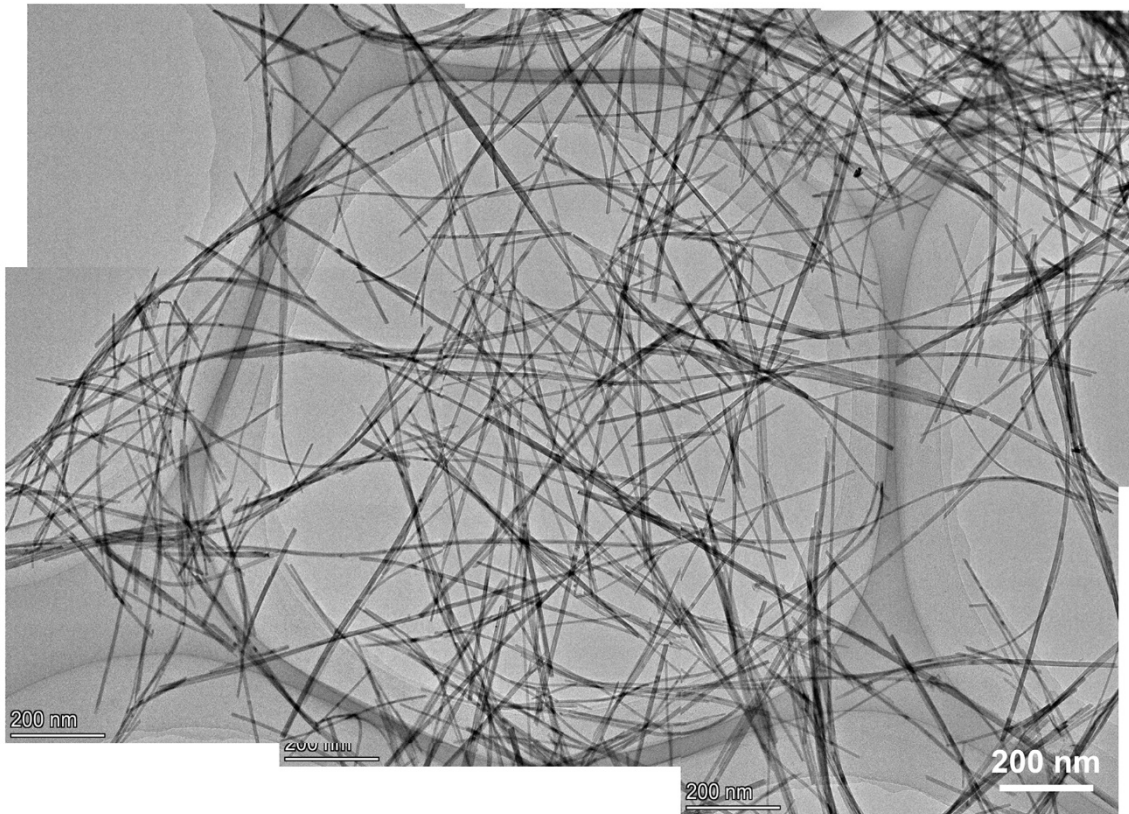

1  
2 **Supplementary Figure 2. TEM image of IrO<sub>2</sub>NR.** TEM images show nanoribbon morphology at a  
3 high magnification.

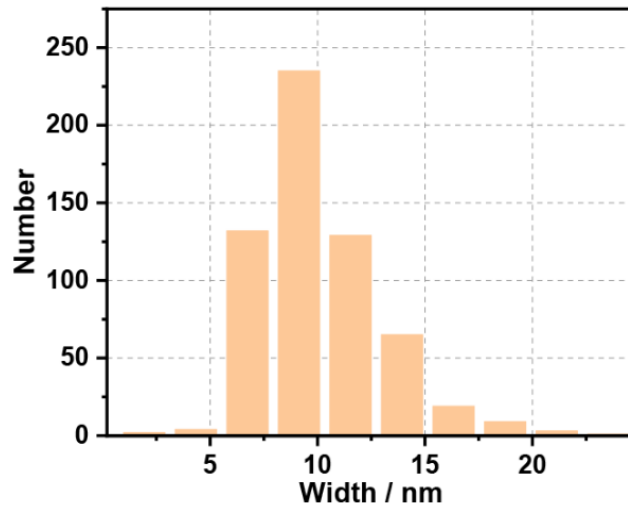

1

2 **Supplementary Figure 3. Statistics histogram showing the width of IrO<sub>2</sub>NR.** The width values  
3 are obtained by 500 nanoribbons.

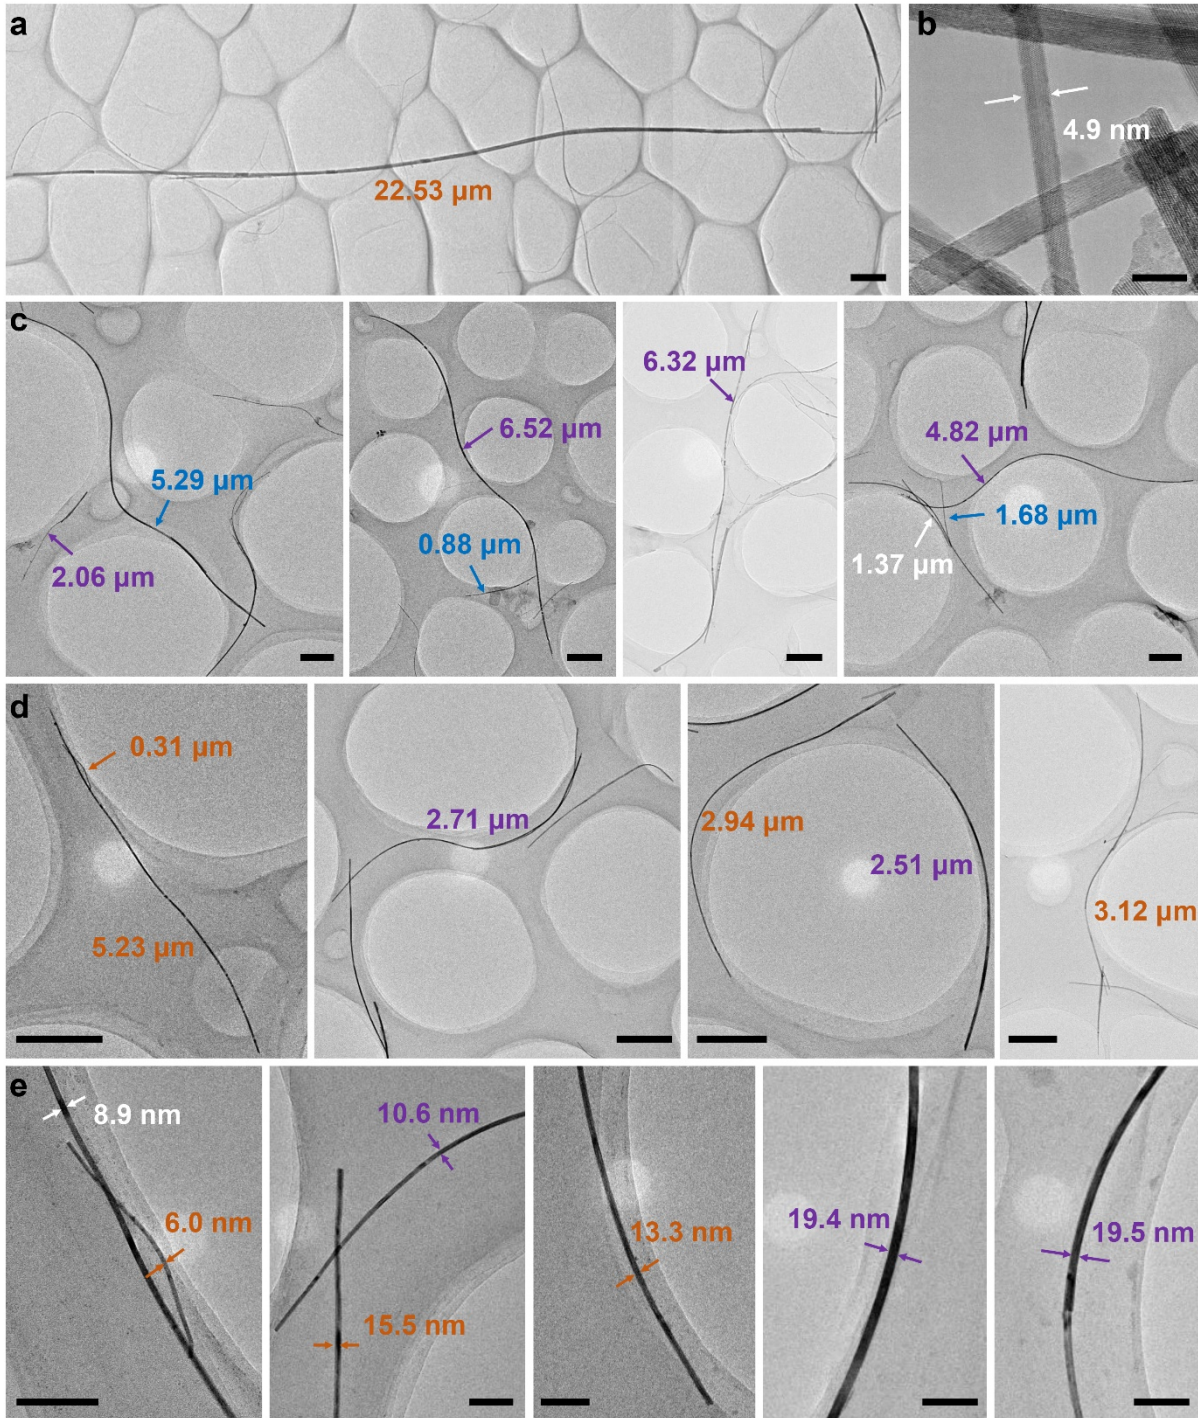

1

2 **Supplementary Figure 4. Gallery of IrO<sub>2</sub>NR.** (a) Typical image of a long IrO<sub>2</sub>NR. Figure bar, 1  
 3 μm; insert bar, 100 nm. (b) Typical image of a thin IrO<sub>2</sub>NR. Figure bar, 10 nm. (c) and (d) IrO<sub>2</sub>NR of  
 4 different lengths. Figure bar, 500 nm. (e) Micrographs of IrO<sub>2</sub>NR with different widths. Figure bar,  
 5 100 nm.

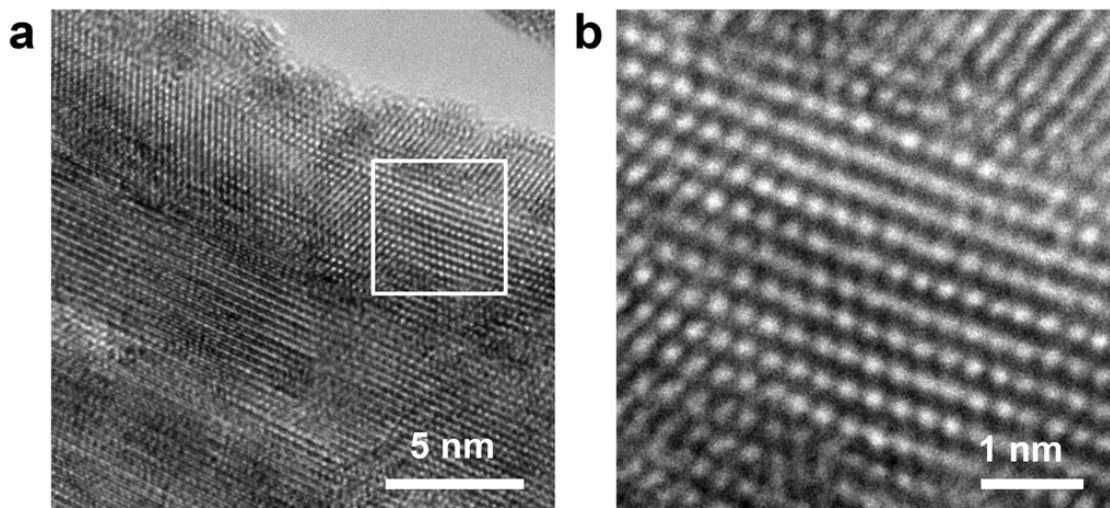

1  
2 **Supplementary Figure 5. Different magnification HETEM images. (a)** Low magnification and **(b)**  
3 high magnification HRTEM images of IrO<sub>2</sub>NR showing the lattice tension/compression.  
4

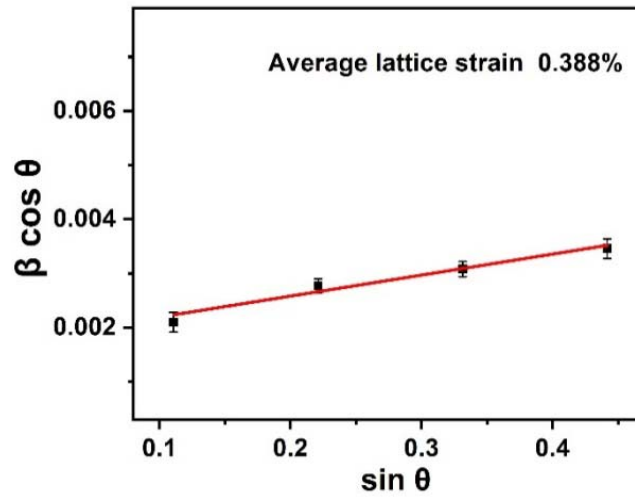

1  
 2 **Supplementary Figure 6. Plot for Williamson-Hall analysis to calculate the lattice strain of**  
 3 **IrO<sub>2</sub>NR.** According to the Williamson-Hall equation:  $\beta \times \cos\theta = K\lambda / D + 4\varepsilon \times \sin\theta$ , where  $\beta$  is the  
 4 full width at half-maximum of the peak,  $\theta$  is the Bragg angle,  $K$  is the shape factor,  $D$  is the  
 5 crystallite size, and  $\lambda$  is the wavelength of X-ray, the lattice strain of IrO<sub>2</sub>NR is calculated to be  
 6 0.388%. Error bars represent standard deviation, n = 3 independent replicates.  
 7

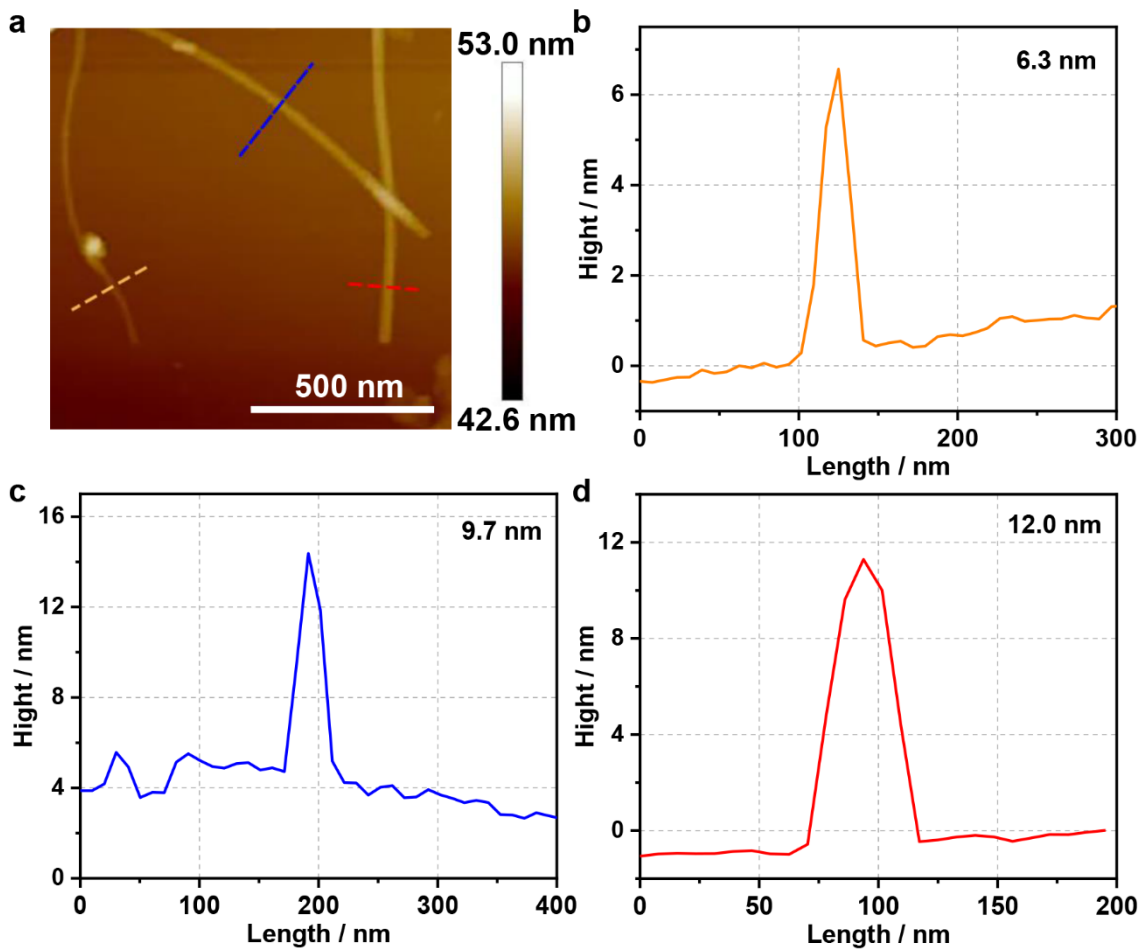

1  
 2 **Supplementary Figure 7. Thickness of IrO<sub>2</sub>NR.** (a) AFM image and (b-d) the corresponding  
 3 height profiles showing the thickness of the IrO<sub>2</sub>NR.  
 4

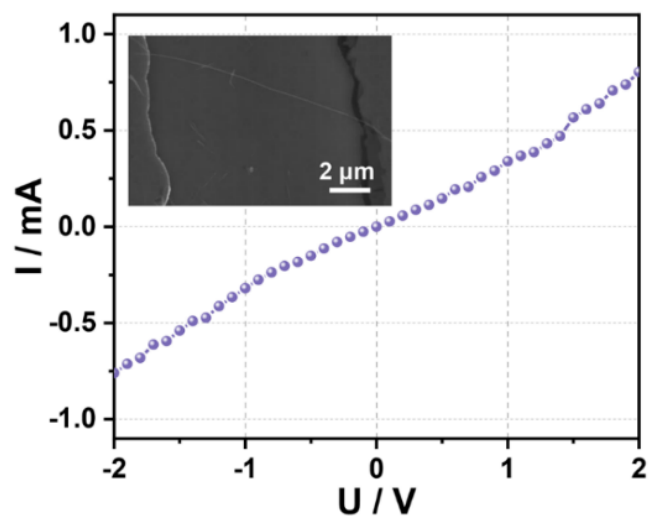

1  
2 **Supplementary Figure 8. I – V curve.** A representative bottom-contact device was fabricated from  
3 a single IrO<sub>2</sub>NR on an ITO substrate. Insert is the optical photograph of the device.  
4



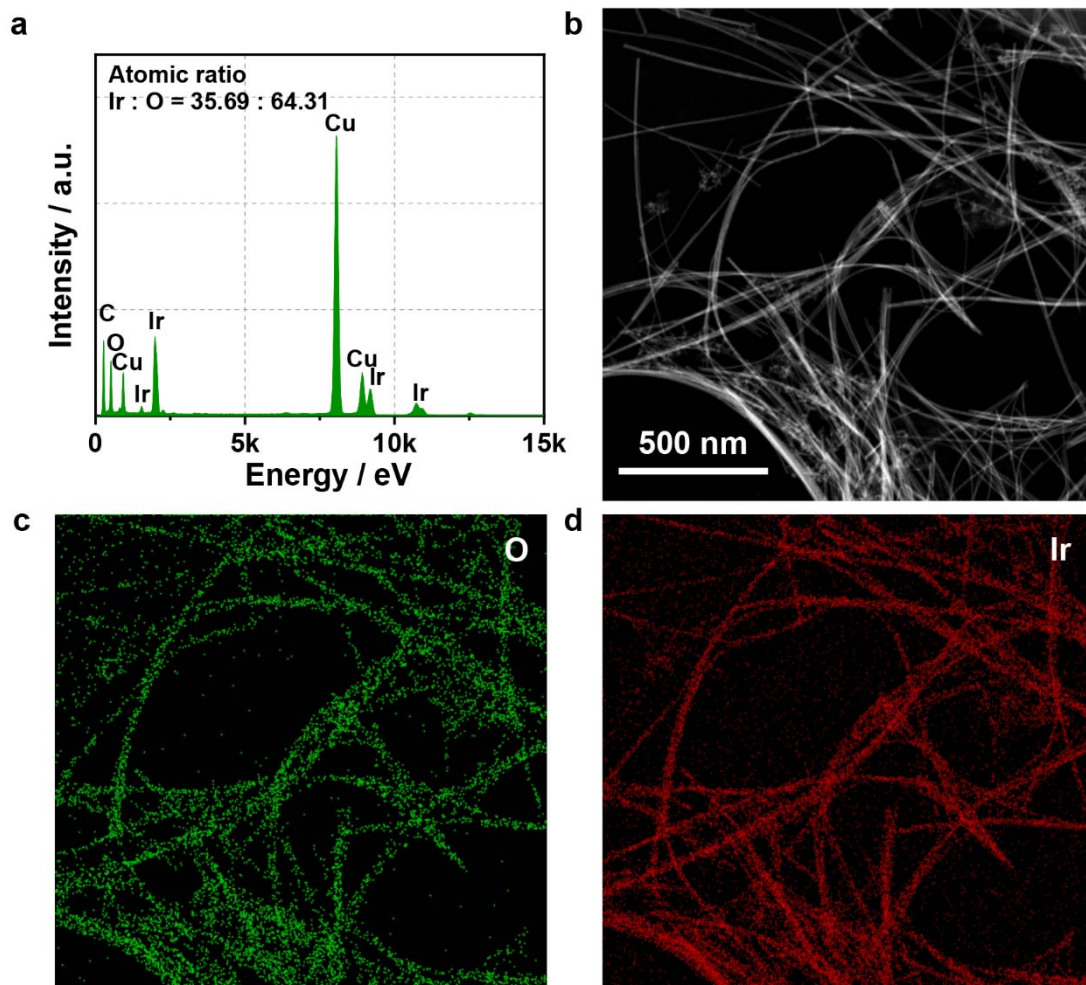

1  
 2 **Supplementary Figure 9. Chemical composition analysis of IrO<sub>2</sub>NR.** (a) TEM-EDS spectrum of  
 3 IrO<sub>2</sub>NR holding on a Cu grid. (b) HAADF-STEM image and corresponding elemental EDS mapping  
 4 image showing the distributions of (c) O and (d) Ir elements.

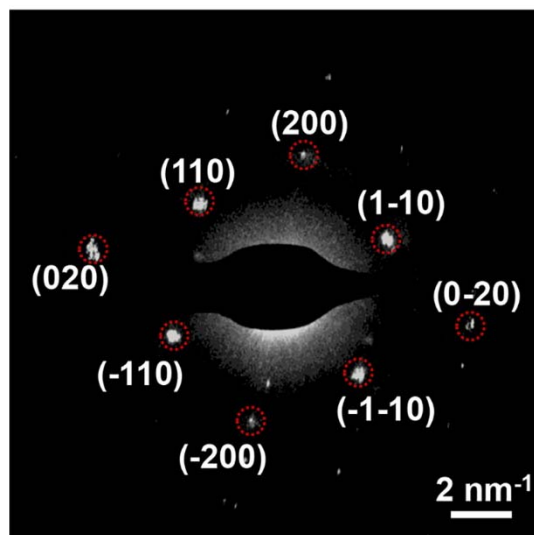

1

2 **Supplementary Figure 10. SAED pattern.** SAED pattern of IrO<sub>2</sub>NR from the [001] direction.

3

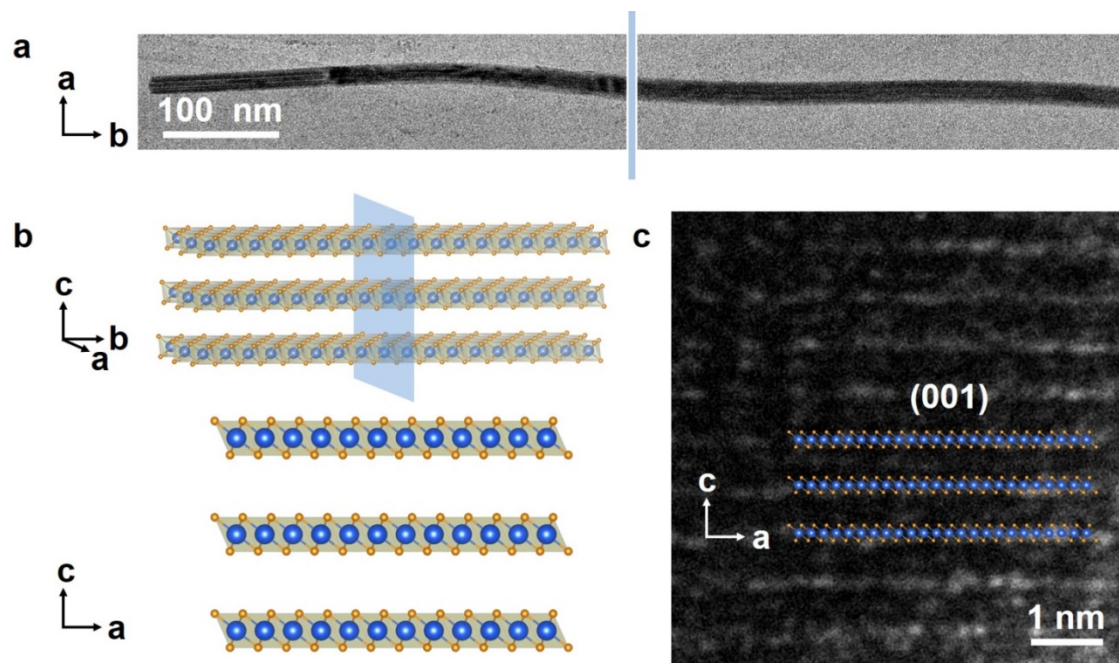

1  
 2 **Supplementary Figure 11. Cross section of IrO<sub>2</sub>NR.** (a) and (b) Schematic showing that the  
 3 IrO<sub>2</sub>NR was embedded in epoxy resin and sliced into pieces to observe the cross section. (c) HRTEM  
 4 image of the cross section for IrO<sub>2</sub>NR showing the (001) plane with distance of 0.69 nm.  
 5

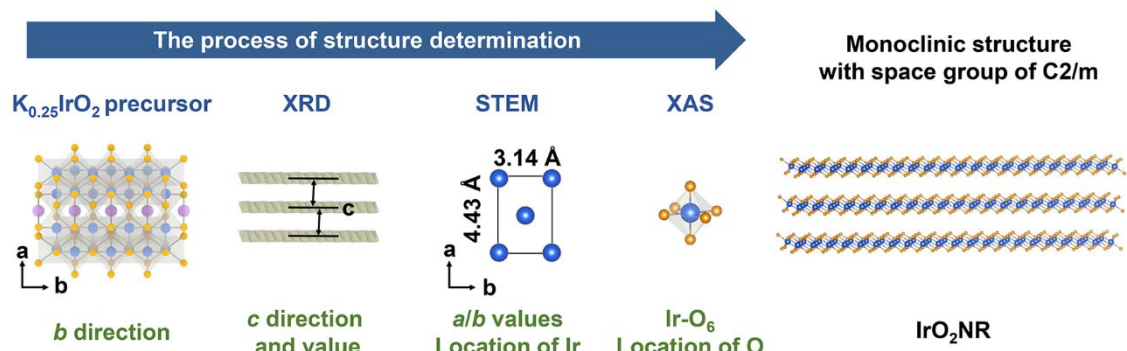

1  
2 **Supplementary Figure 12. Structure determination process.** The schematic diagram showing the  
3 process of the structure determination of IrO<sub>2</sub>NR.

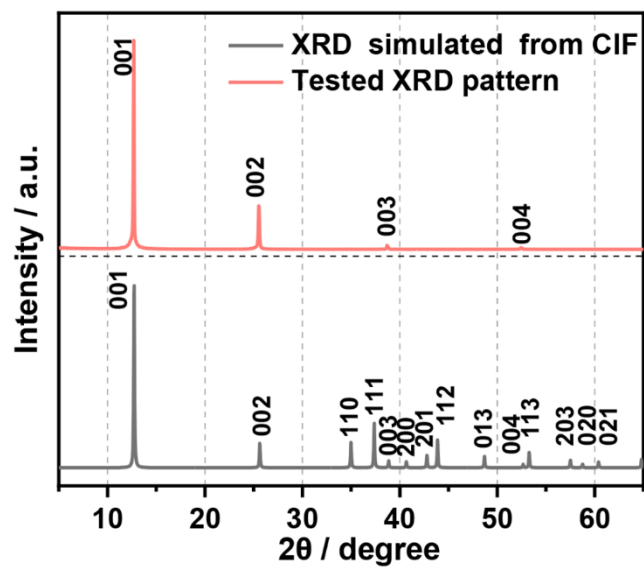

1

2 **Supplementary Figure 13. XRD patterns.** The simulated and tested XRD patterns of IrO<sub>2</sub>NR.

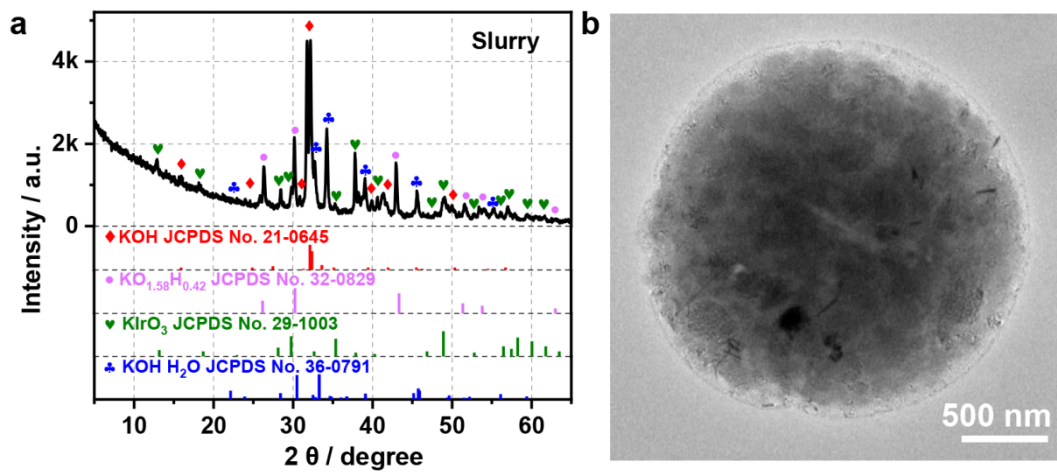

1  
2 **Supplementary Figure 14. Characterization of the initial slurry before washing by water. (a)**  
3 **XRD pattern and (b) TEM image.**

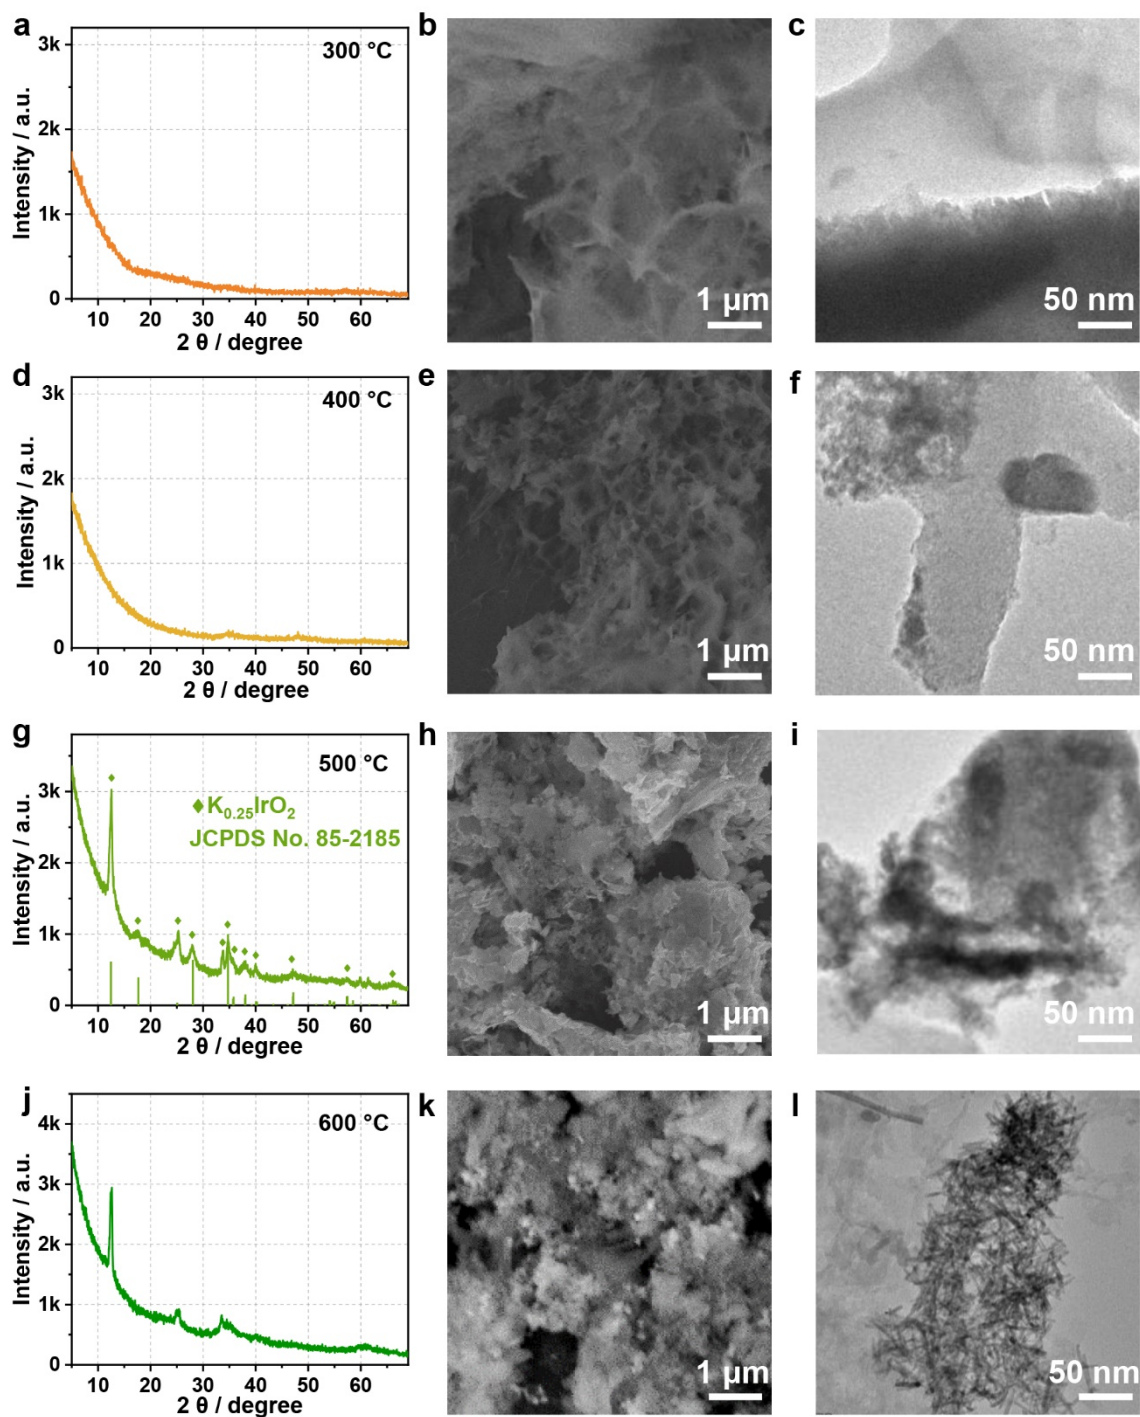

1

2 **Supplementary Figure 15. The phase and morphology of samples at different reaction**  
 3 **temperatures. (a)** XRD pattern, **(b)** SEM image and **(c)** TEM image of sample annealed at 300 °C.  
 4 **(d)** XRD pattern, **(e)** SEM image and **(f)** TEM image of sample annealed at 400 °C. **(g)** XRD pattern,  
 5 indexed as  $K_{0.25}IrO_2$ ; **(h)** SEM image and **(i)** TEM image of sample annealed at 500 °C. **(j)** XRD  
 6 pattern, **(k)** SEM image and **(l)** TEM image of sample annealed at 600 °C.

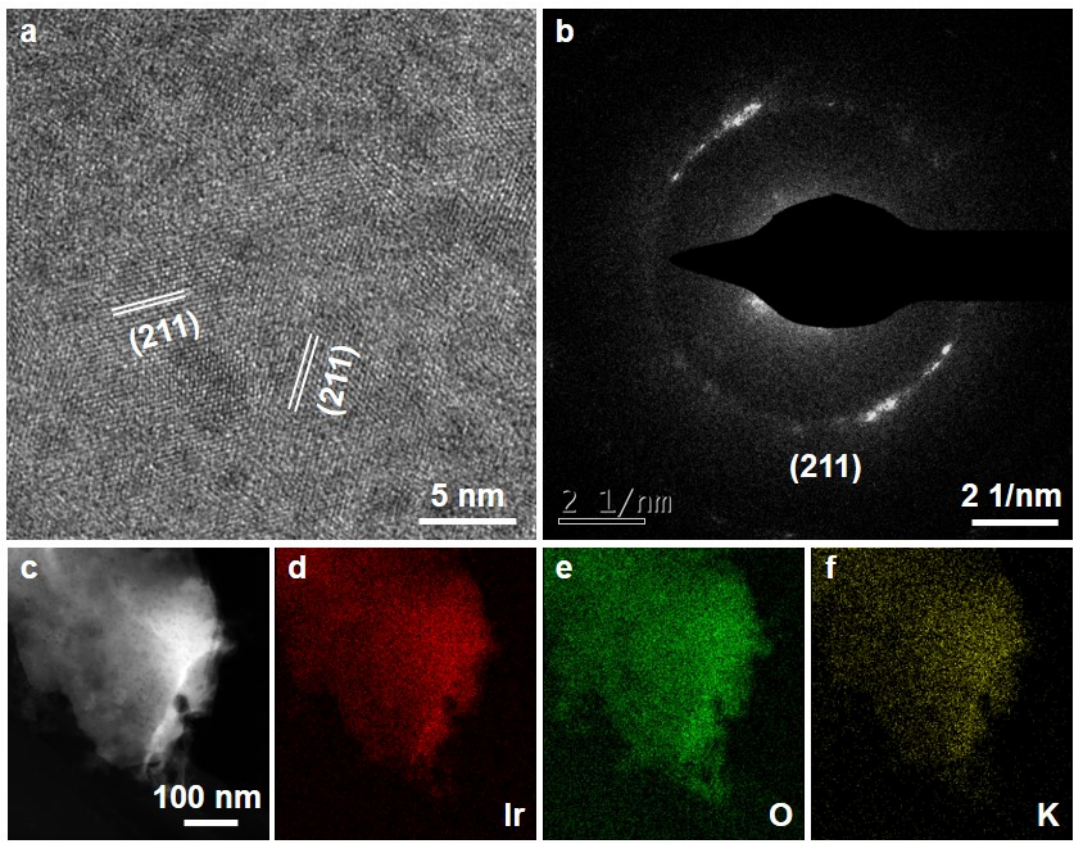

1  
2 **Supplementary Figure 16. Chemical composition analysis of  $K_{0.25}IrO_2$  obtained at reaction**  
3 **temperature of 500 °C. (a) HRTEM image, (b) SAED, (c) HAADF-STEM image and**  
4 **corresponding elemental EDS mapping image showing the distributions of (d) Ir, (e) O, and (f) K**  
5 **elements.**



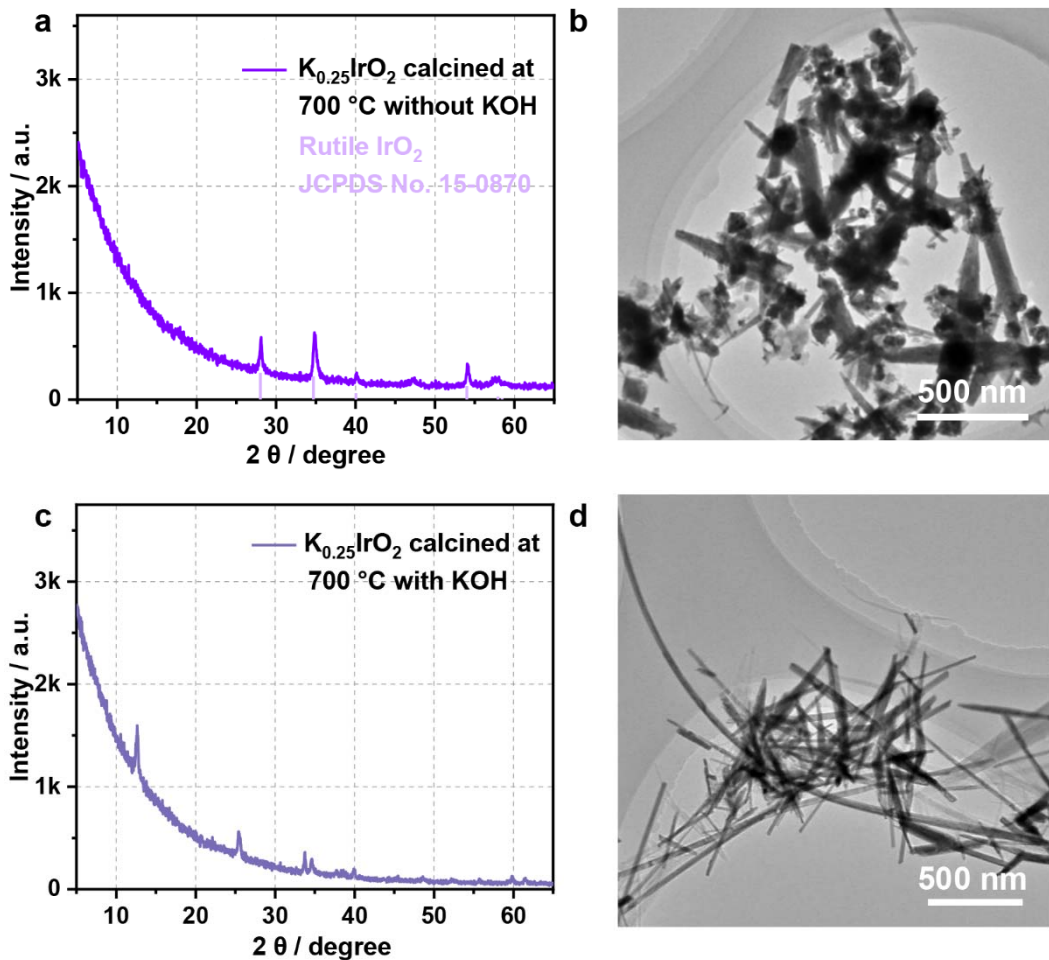

1

2 **Supplementary Figure 17. The comparison experiments showing the important role of the**  
 3 **alkaline condition.** (a) XRD pattern of sample by calcining  $K_{0.25}IrO_2$  at 700 °C for 2 h without KOH,  
 4 which is indexed as Rutile  $IrO_2$ . (b) TEM image of the above mentioned Rutile  $IrO_2$ . (c) XRD pattern  
 5 of the sample that calcined the mixture of  $K_{0.25}IrO_2$  and KOH at 700 °C for 2 h, where the layered  
 6 structure appears. (d) TEM image of the above mentioned sample.

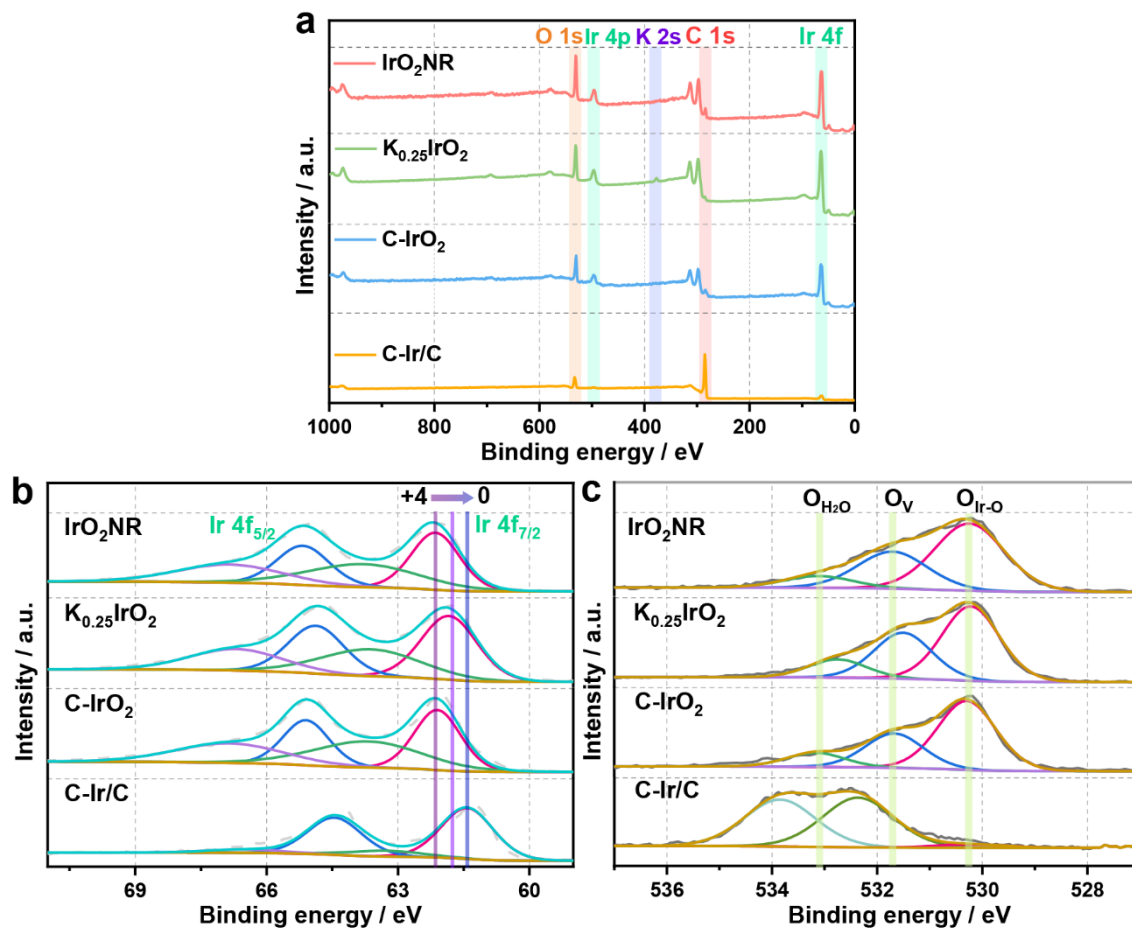

1

2 **Supplementary Figure 18. XPS spectra.** (a) Full spectra; (b) Ir 4f peaks and (c) O 1s peaks for  
 3 IrO<sub>2</sub>NR, K<sub>0.25</sub>IrO<sub>2</sub>, C-IrO<sub>2</sub> and C-Ir/C. The O 1s for C-Ir/C may come from the adsorbed oxygen  
 4 species with carbon materials.

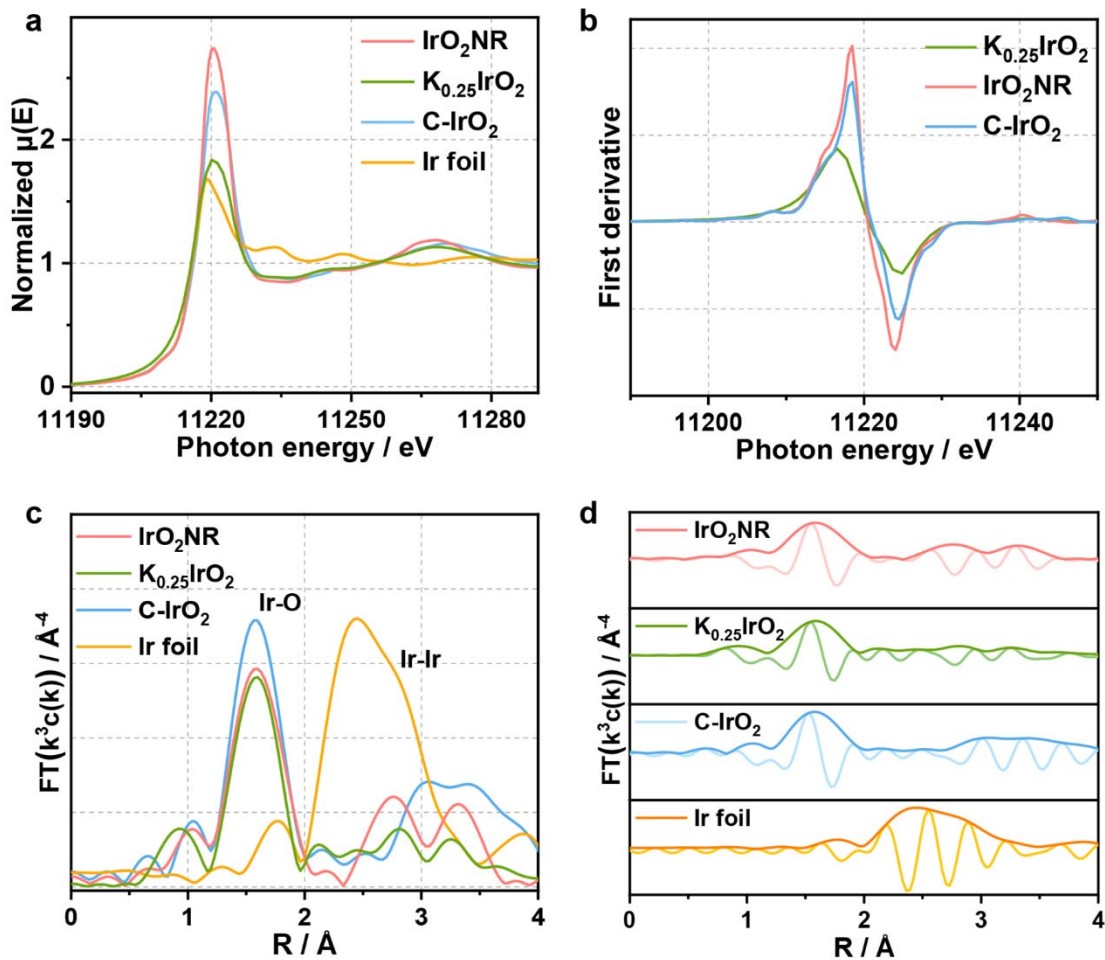

1  
2  
3  
4  
5  
6

**Supplementary Figure 19. XAS analysis of IrO<sub>2</sub>NR, K<sub>0.25</sub>IrO<sub>2</sub>, C-IrO<sub>2</sub>, and Ir foil. (a)** XANES spectra for IrO<sub>2</sub>NR, K<sub>0.25</sub>IrO<sub>2</sub>, C-IrO<sub>2</sub> and Ir foil. **(b)** The first derivative of normalized intensity for IrO<sub>2</sub>NR, K<sub>0.25</sub>IrO<sub>2</sub> and C-IrO<sub>2</sub> in **(a)**. **(c)** FT-EXAFS spectra for IrO<sub>2</sub>NR, K<sub>0.25</sub>IrO<sub>2</sub>, C-IrO<sub>2</sub> and Ir foil. **(d)** The stacked magnitude and imaginary parts of IrO<sub>2</sub>NR, K<sub>0.25</sub>IrO<sub>2</sub>, C-IrO<sub>2</sub>, and Ir foil.

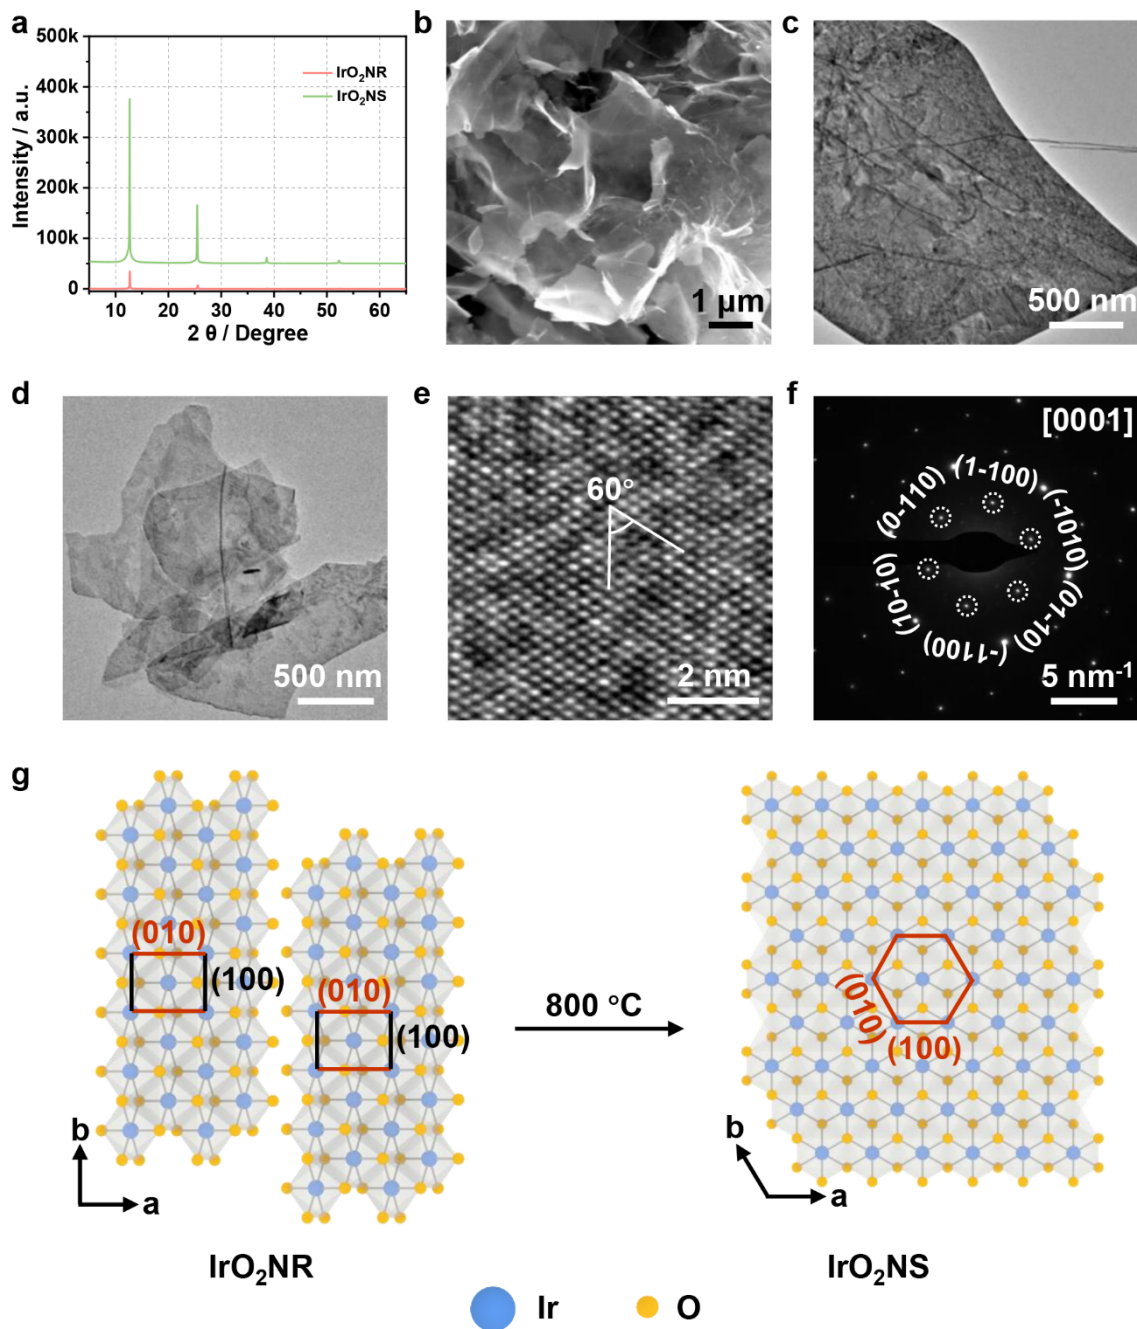

1  
 2 **Supplementary Figure 20. The phase, morphology and formation mechanism of samples**  
 3 **calcined at temperature of 800 °C. (a) XRD pattern of IrO<sub>2</sub>NS and IrO<sub>2</sub>NR; (b) SEM image of**  
 4 **IrO<sub>2</sub>NS; (c) and (d) TEM image of IrO<sub>2</sub>NS, most of the sample showing nanosheet structure with**  
 5 **several nanoribbons in it. (e) HRTEM image, and (f) SAED pattern of IrO<sub>2</sub>NS; (g) Schematic**  
 6 **diagram illustrating the structure evolution of IrO<sub>2</sub>NR to IrO<sub>2</sub>NS.**

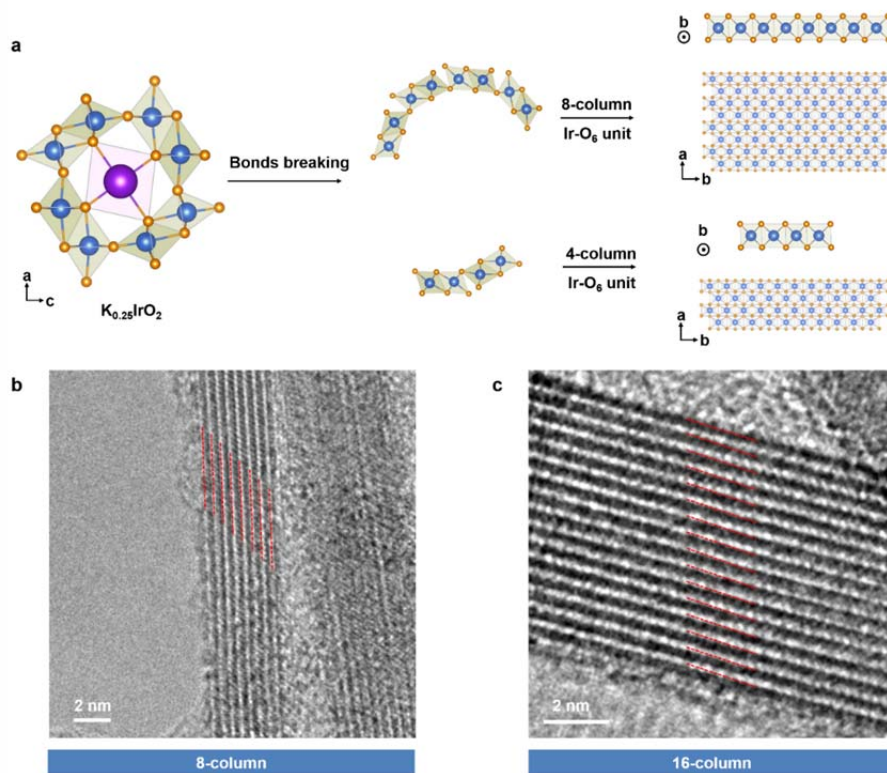

1  
 2 **Supplementary Figure 21. The conversion of  $K_{0.25}IrO_2$  to  $IrO_2NR$ .** (a) Schematic showing that  
 3 the columns of  $[IrO_6]$  subunits that perpendicular to the  $b$  direction are even numbers, taking 4 and 8  
 4 columns as examples. (b) and (c) Corresponding HRTEM images showing the even number layers of  
 5  $[IrO_6]$  subunits.

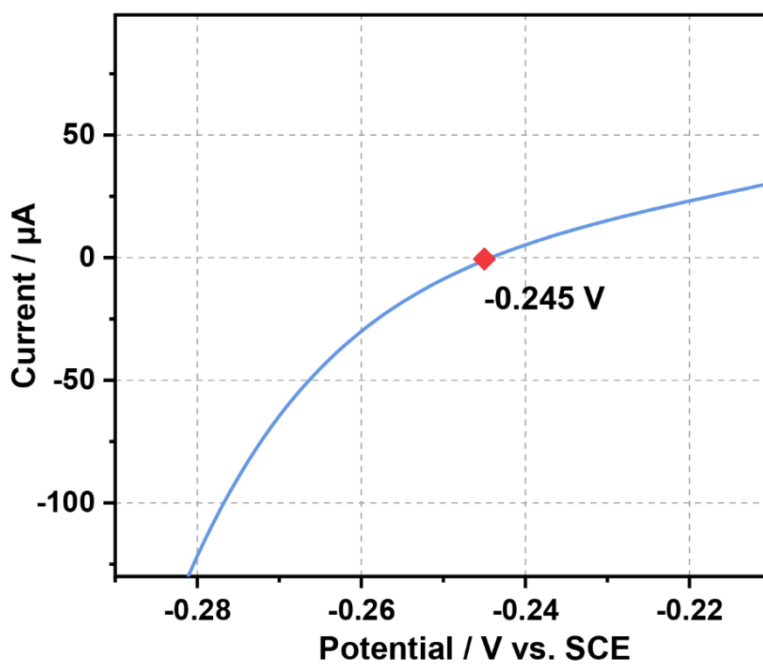

1

2 **Supplementary Figure 22. Calibration of the saturated calomel electrode (SCE).** Calibration of  
3 the SCE electrode with respect to reversible hydrogen electrode (RHE) in 0.5 M H<sub>2</sub>SO<sub>4</sub> electrolytes  
4 bubbled with pure hydrogen gas at room temperature. Scan rate: 1 mV s<sup>-1</sup>.

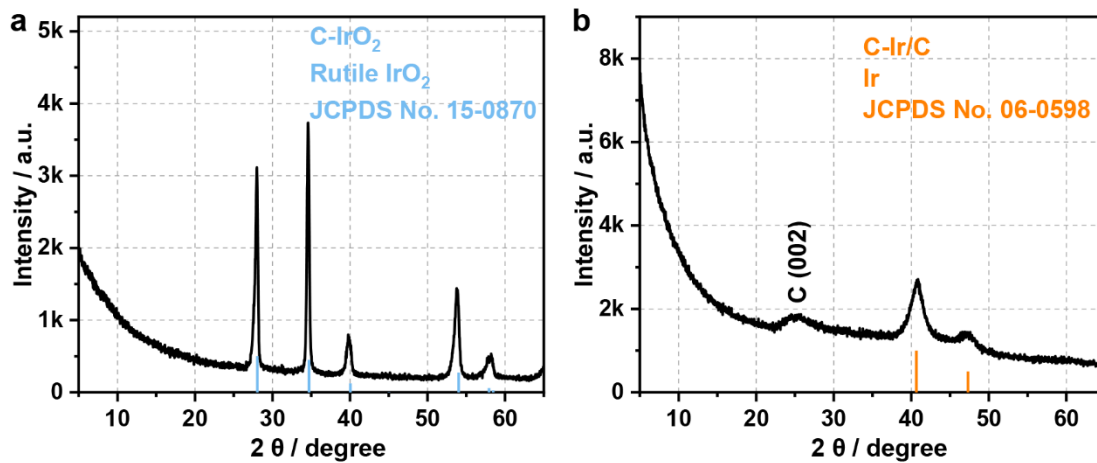

1

2 **Supplementary Figure 23. XRD patterns of commercial samples. (a) C-IrO<sub>2</sub> and (b) C-Ir/C.**

3

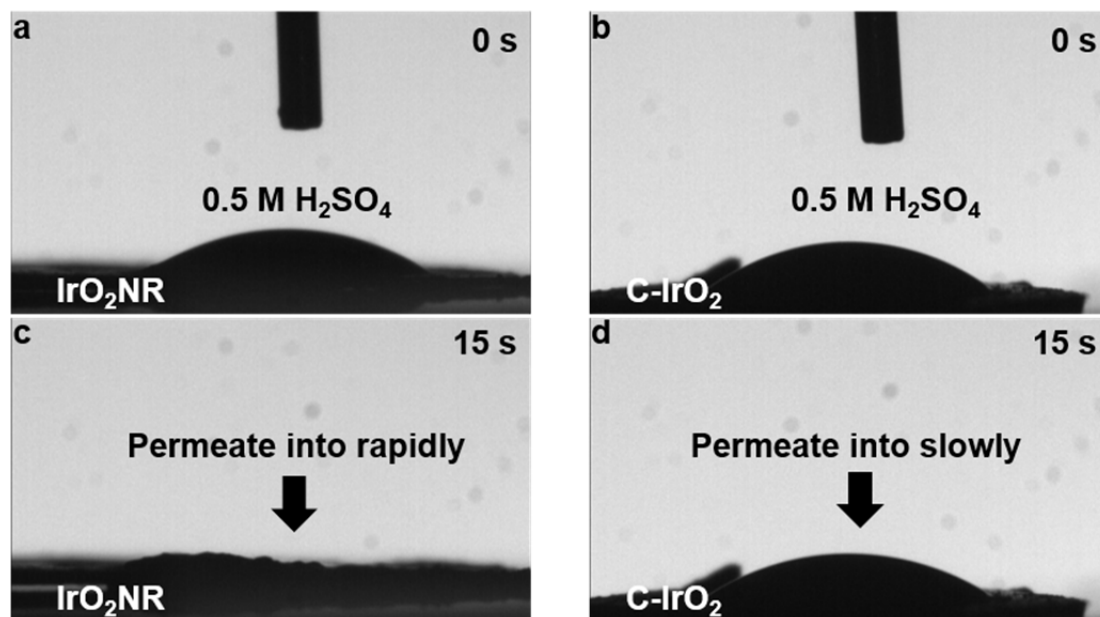

1

2 **Supplementary Figure 24. The contact angles at different time.** H<sub>2</sub>SO<sub>4</sub> (0.5 M) droplet on  
3 IrO<sub>2</sub>NR tablet at (a) 0 s and (c) 15 s. H<sub>2</sub>SO<sub>4</sub> (0.5 M) droplet on C-IrO<sub>2</sub> tablet at (b) 0 s and (d) 15 s.  
4 The H<sub>2</sub>SO<sub>4</sub> permeate into the IrO<sub>2</sub>NR more rapidly than that into C-IrO<sub>2</sub>.



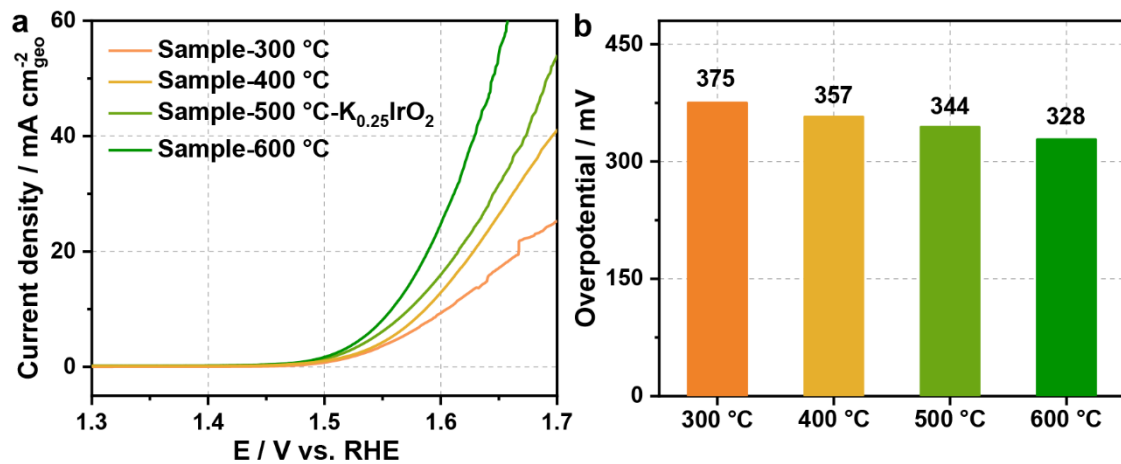

1  
2 **Supplementary Figure 25. OER performance of samples obtained at different reaction steps. (a)**  
3 **The LSV curves, and (b) histograms showing the overpotentials of corresponding samples in 0.5 M**  
4 **H<sub>2</sub>SO<sub>4</sub>.**

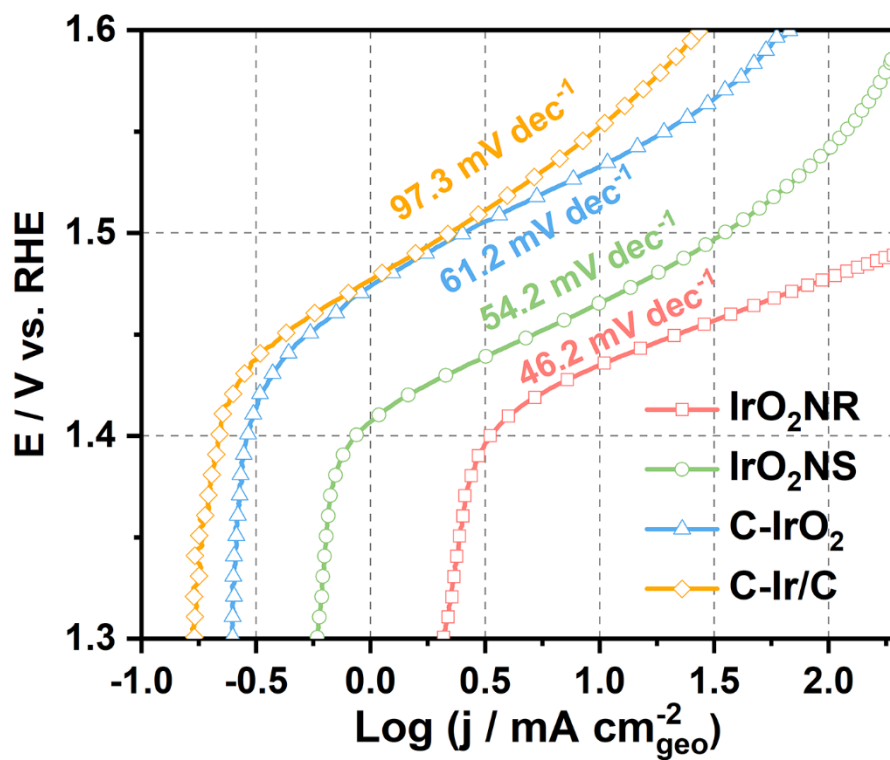

1  
 2 **Supplementary Figure 26. Tafel plots.** Tafel plots and corresponding Tafel slopes of IrO<sub>2</sub>NR,  
 3 IrO<sub>2</sub>NS, C-IrO<sub>2</sub>, and C-Ir/C.

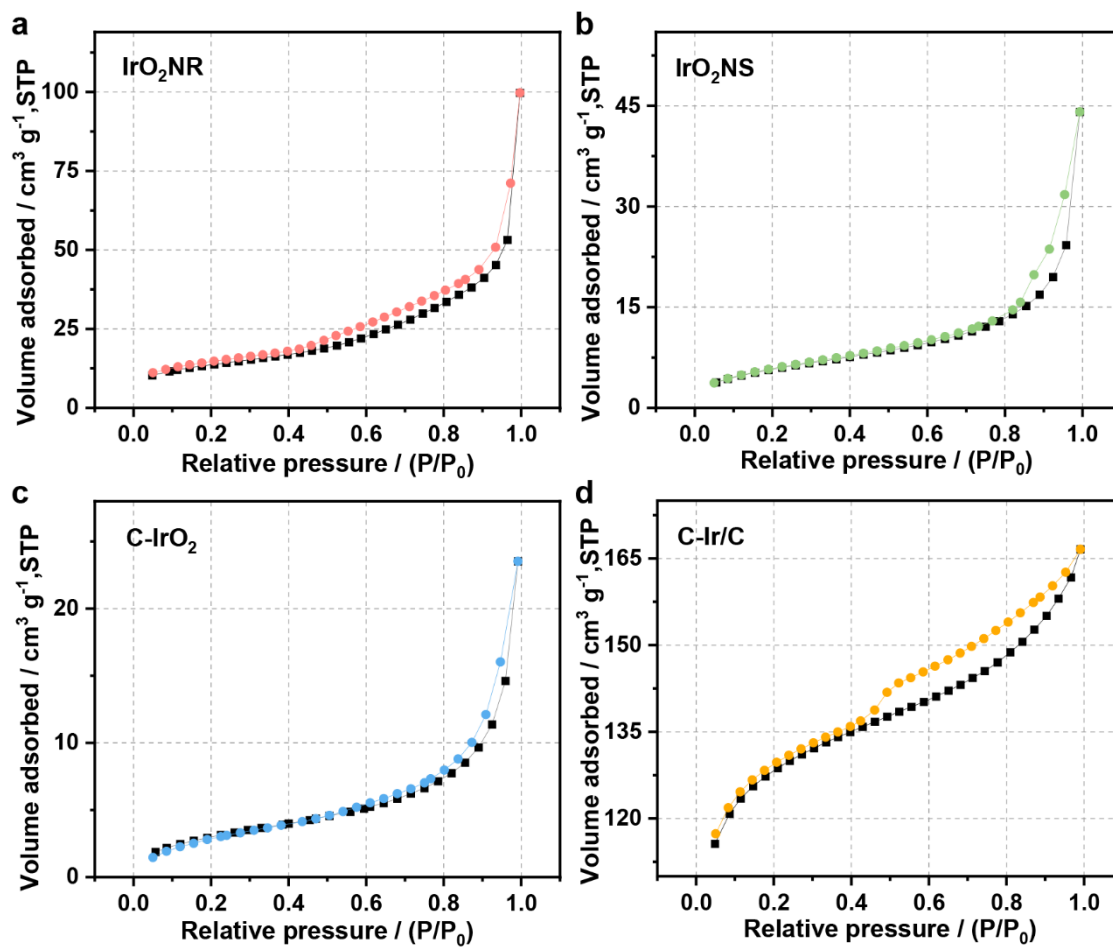

1

2 **Supplementary Figure 27. BET surface area measurements.** N<sub>2</sub> adsorption-desorption isotherms  
 3 obtained for (a) IrO<sub>2</sub>NR; (b) IrO<sub>2</sub>NS; (c) C-IrO<sub>2</sub>; and (d) C-Ir/C.

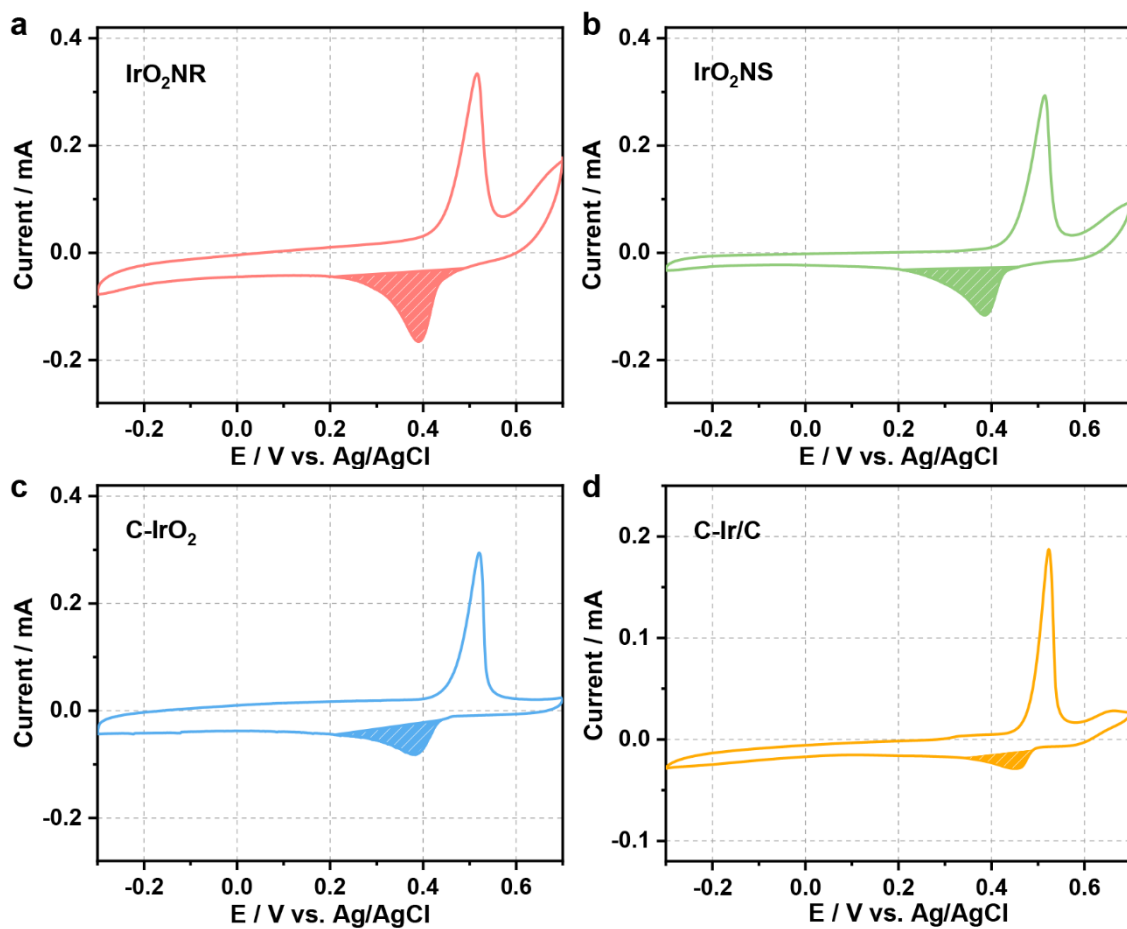

1

2 **Supplementary Figure 28. ECSA measurements.** The CV curves of (a) IrO<sub>2</sub>NR; (b) IrO<sub>2</sub>NS; (c)  
 3 C-IrO<sub>2</sub>; and (d) C-Ir/C in 0.1 M HClO<sub>4</sub> electrolyte containing 1 mM mercury nitrate at the scan rate  
 4 of 100 mV s<sup>-1</sup>.

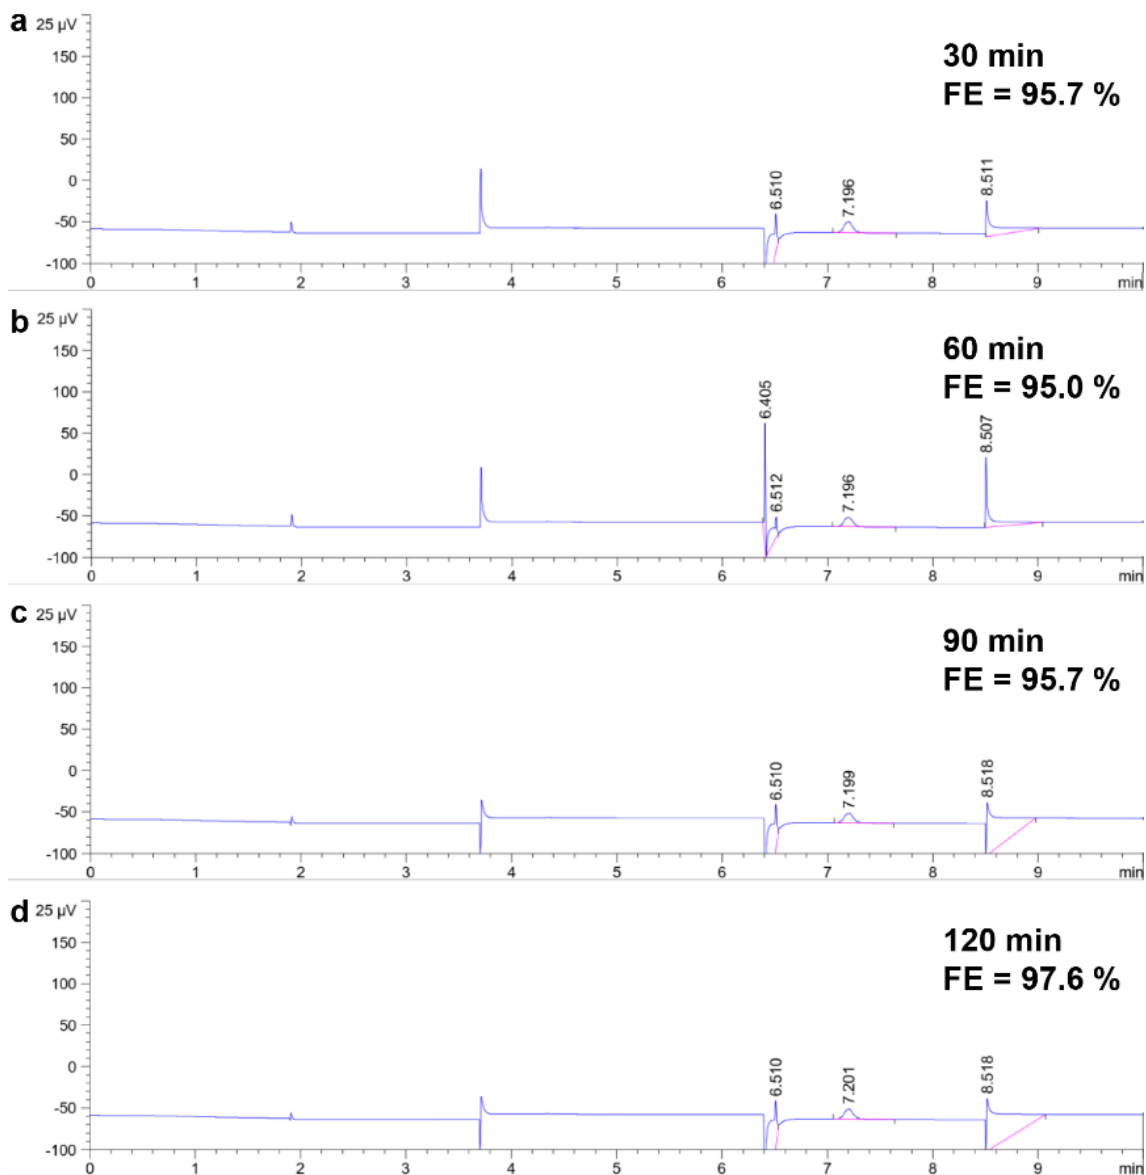

1  
2 **Supplementary Figure 29. Gas chromatograph data of the produced oxygen by IrO<sub>2</sub>NR at**  
3 **different reaction time at a current density of 20 mA cm<sub>geo</sub><sup>-2</sup>. (a) 30 min; (b) 60 min; (c) 90 min;**  
4 **and (d) 120 min.**

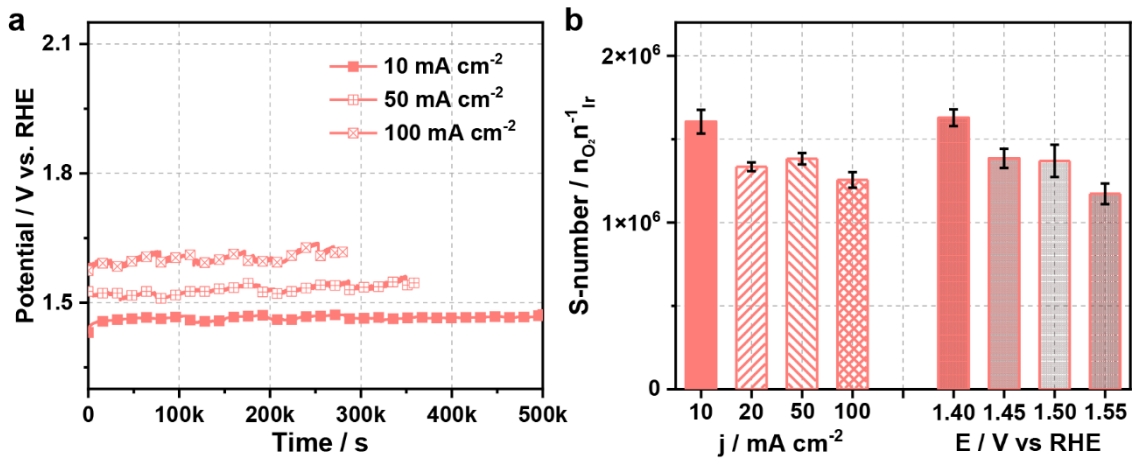

1

2 **Supplementary Figure 30. Stability tests for IrO<sub>2</sub>NR.** (a) Chronopotentiometric curves of IrO<sub>2</sub>NR  
 3 at a constant current density of 10, 50 and 100 mA cm<sup>-2</sup>; and (b) S-numbers of IrO<sub>2</sub>NR at different  
 4 current densities and different applied potentials (Error bars represent standard deviation, n = 3  
 5 independent replicates).

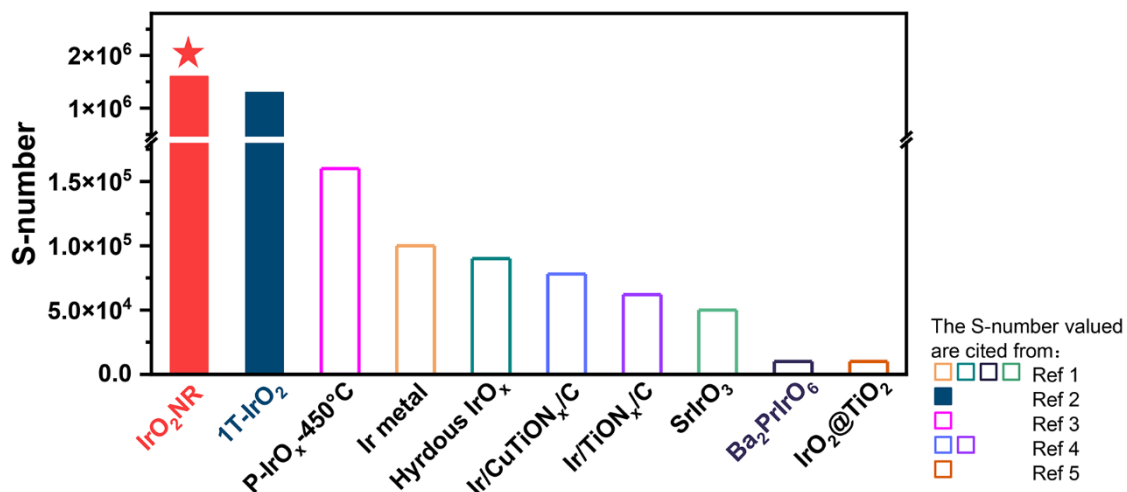

1

2 **Supplementary Figure 31. Comparison of S-number values.** S-number values of IrO<sub>2</sub>NR  
 3 compared with other reported iridium-based OER catalysts<sup>1-5</sup>.

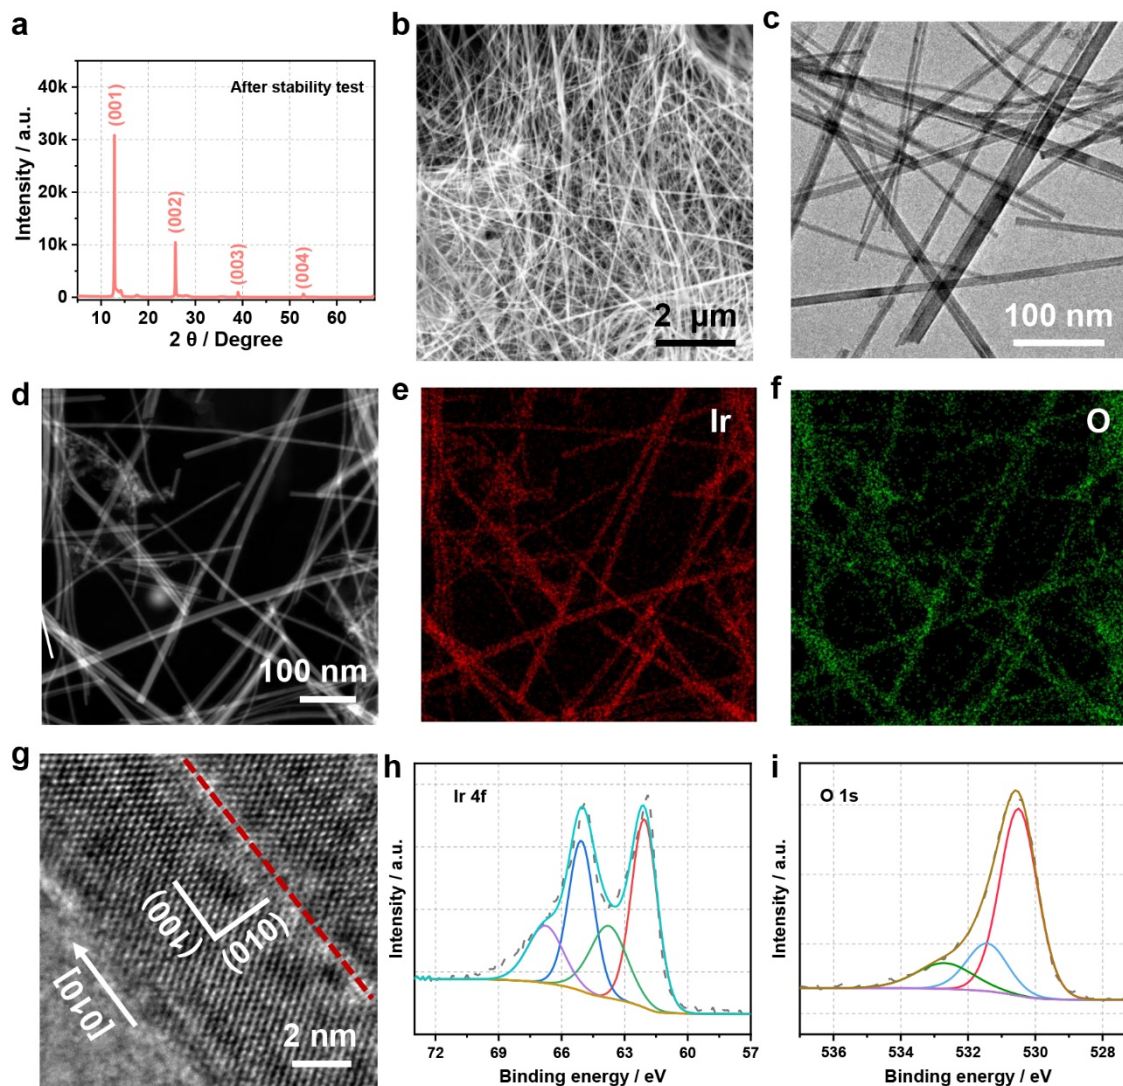

1  
 2 **Supplementary Figure 32. Structure of IrO<sub>2</sub>NR after long stability test with the constant**  
 3 **current density of 10 mA cm<sup>-2</sup> in 0.5 M H<sub>2</sub>SO<sub>4</sub> electrolyte. (a) XRD pattern showing the**  
 4 **maintained layered structure of IrO<sub>2</sub>NR. (b) SEM image, (c) TEM image, (d) HAADF-STEM image**  
 5 **and corresponding elemental EDS mapping image showing the distribution of (e) Ir and (f) O**  
 6 **elements. The IrO<sub>2</sub>NR are uniformly dispersed without aggregation or morphology change after**  
 7 **undergoing the long-term OER. (g) HRTEM image showing clearly the regular atomic arrangement.**  
 8 **The XPS spectra of (h) Ir 4f peak and (i) O 1s peak. The valence state of Ir keeps almost constant**  
 9 **with the original IrO<sub>2</sub>NR.**



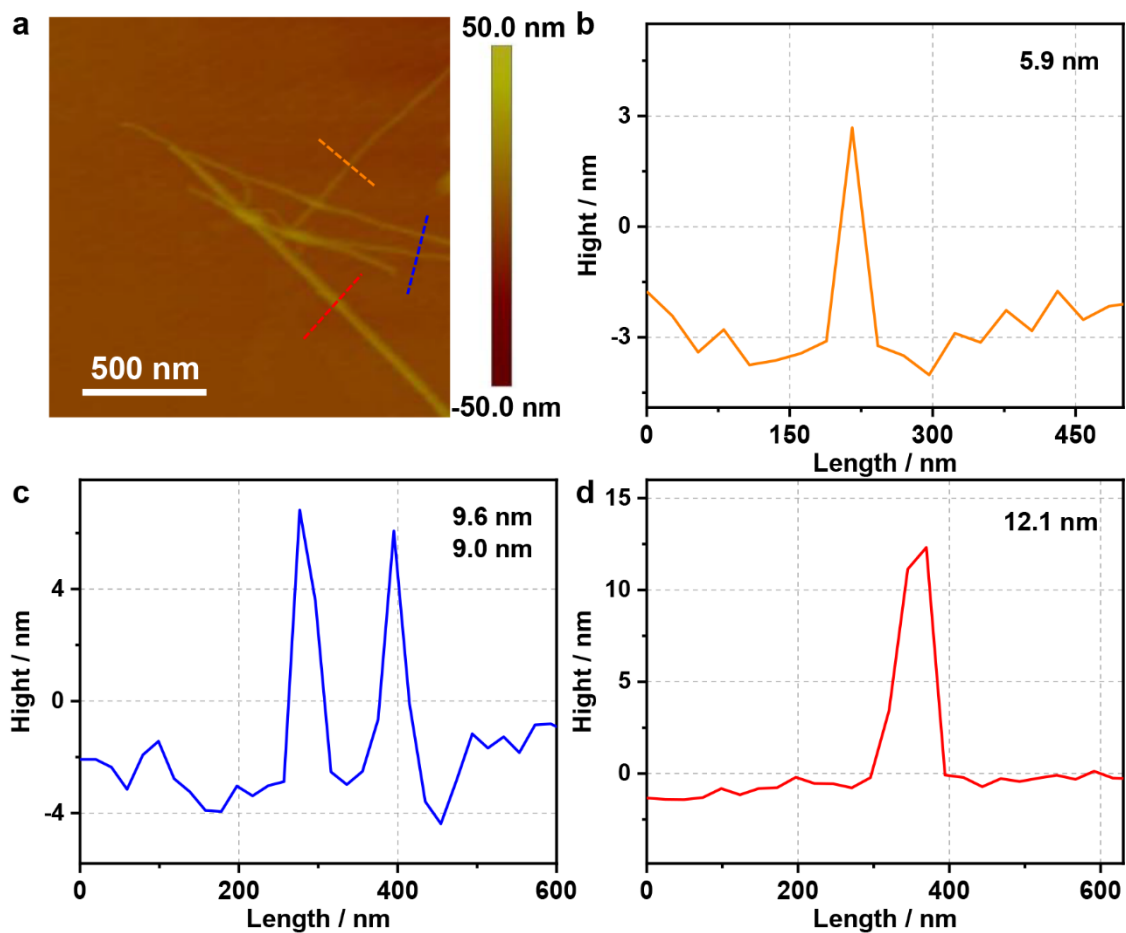

1  
2  
3  
4

**Supplementary Figure 33. Thickness of IrO<sub>2</sub>NR after stability test. (a) AFM image and (b-d) the corresponding height profiles showing the thickness of the IrO<sub>2</sub>NR.**

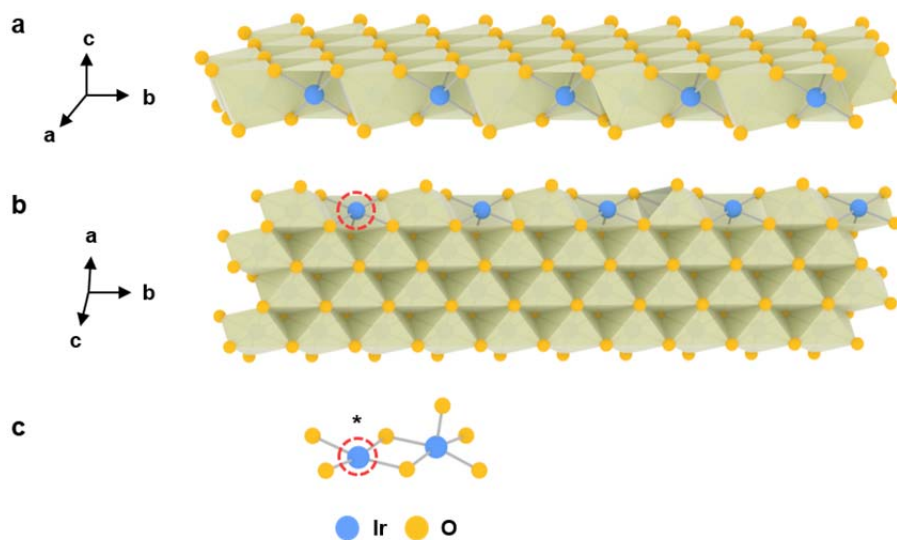

1

2 **Supplementary Figure 34. Structure of IrO<sub>2</sub>NR. (a) and (b)** Crystal structures of the IrO<sub>2</sub>NR with

3 an exposed edge for the (001) plane during theoretical calculation with different viewing angles. (c)

4 The ball-and-stick model extracted from (b) to show the surface location of active Ir in Figure 4c.

5

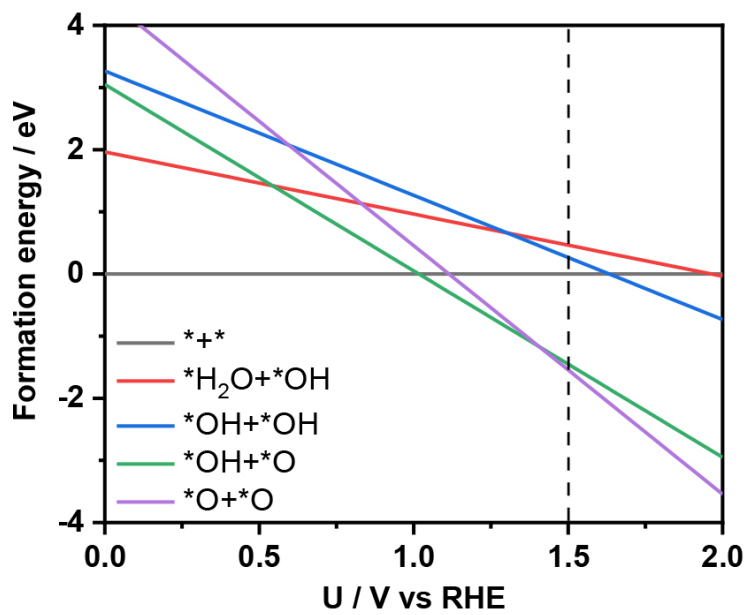

1

2 **Supplementary Figure 35. Surface termination of the IrO<sub>2</sub>NR under acidic conditions.**  
 3 Theoretical Pourbaix diagram of IrO<sub>2</sub>NR (100) surface.

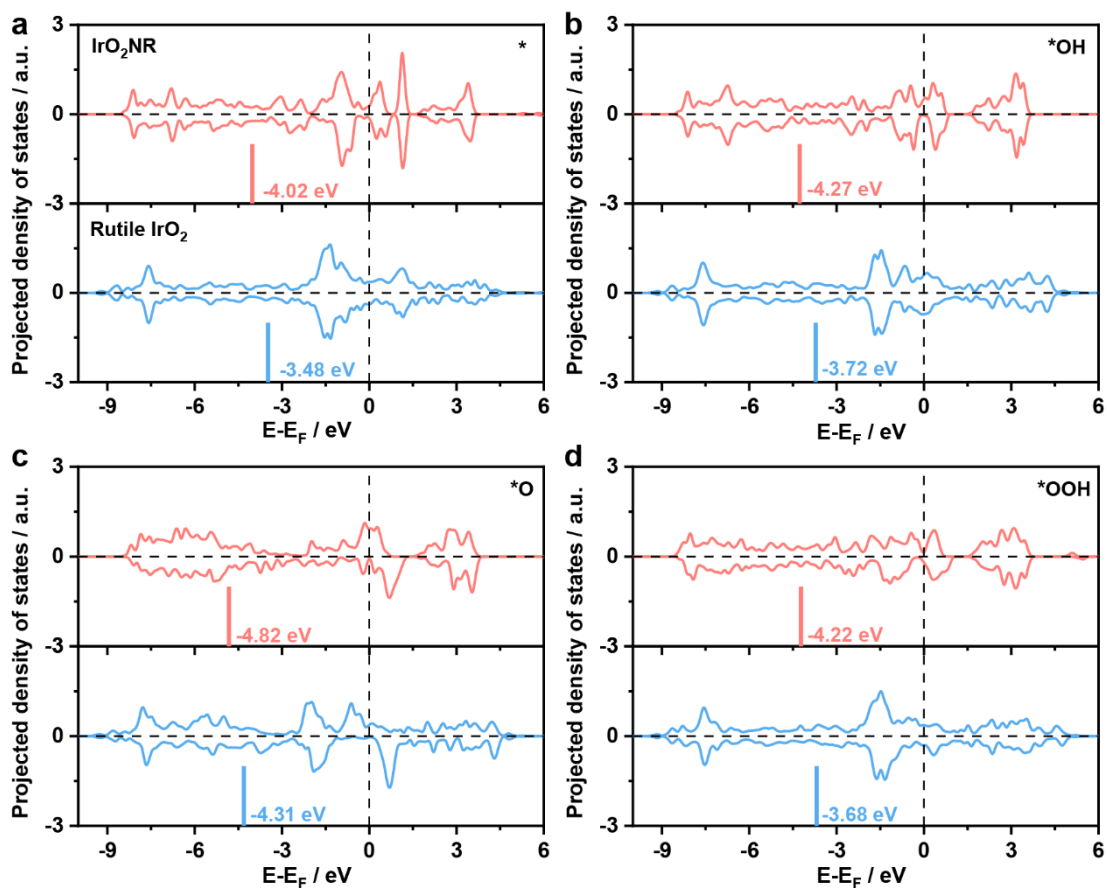

1  
2  
3  
4  
5

**Supplementary Figure 36.** The electronic properties of the Ir atoms. Comparison of *d*-orbital distribution of Ir atoms for the (a) \*, (b) \*OH, (c) \*O and (d) \*OOH in IrO<sub>2</sub>NR (red curve) and Rutile IrO<sub>2</sub> (blue curve).

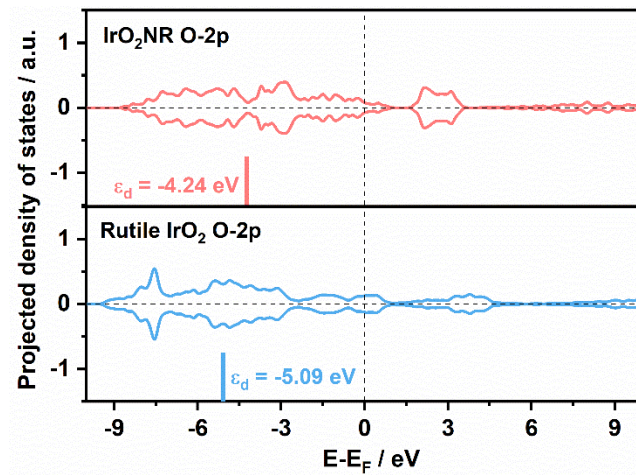

1

2 **Supplementary Figure 37. The electronic properties of the O atoms.** Comparison of the  
3  $2p$ -orbital distribution of the O atoms in the Rutile IrO<sub>2</sub> and IrO<sub>2</sub>NR.  
4

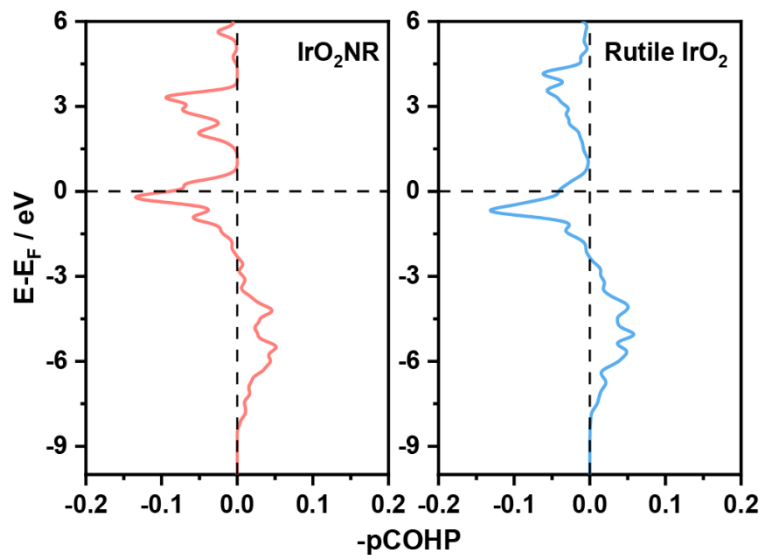

1  
2  
3  
4

**Supplementary Figure 38. Comparisons of projected crystal orbital Hamilton population. The Ir-O bonds in IrO<sub>2</sub>NR (left) and the Ir-O bonds in Rutile IrO<sub>2</sub> (right).**

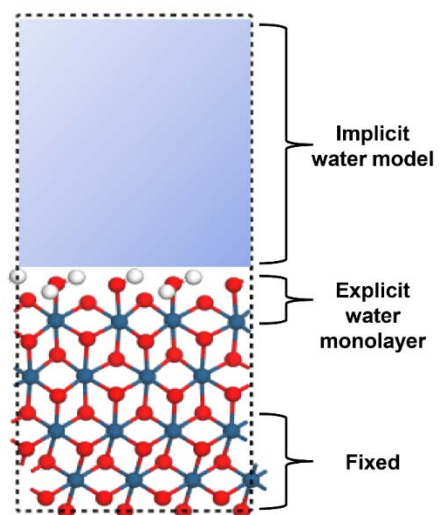

1  
2 **Supplementary Figure 39. Implicit solvation model.** Schematic implicit solvation model for the  
3 calculation of Pourbaix diagram of IrO<sub>2</sub>NR.

1 **Supplementary Tables**2 **Supplementary Table 1. Crystallographic information for IrO<sub>2</sub>NR and C-IrO<sub>2</sub>.**

| <b>Material</b>          | <b>Crystal system</b> | <b>Bravais lattice</b> | <b>Unit-cell dimension</b>                                                                                                        | <b>Space group</b>             |
|--------------------------|-----------------------|------------------------|-----------------------------------------------------------------------------------------------------------------------------------|--------------------------------|
| <b>IrO<sub>2</sub>NR</b> | <b>Monoclinic</b>     | <b>C-centered</b>      | $a = 4.43 \pm 0.01 \text{ \AA}, b = 3.14 \pm 0.02 \text{ \AA}, c = 6.95 \pm 0.03 \text{ \AA}; \alpha = \beta = \gamma = 90^\circ$ | <b>C2/m (12)</b>               |
| <b>C-IrO<sub>2</sub></b> | <b>Tetragonal</b>     | <b>Primitive</b>       | $a = b = 4.498 \text{ \AA}, c = 3.154 \text{ \AA}; \alpha = \beta = \gamma = 90^\circ$                                            | <b>P4<sub>2</sub>/mm (136)</b> |
| <b>IrO<sub>2</sub>NS</b> | <b>Trigonal</b>       | <b>Primitive</b>       | $a = b = 3.11 \text{ \AA}, c = 6.91 \text{ \AA}; \alpha = \beta = 90^\circ, \gamma = 120^\circ$                                   | <b>P-3m1 (164)</b>             |

3



1 **Supplementary Table 2. The BET areas and ECSAs of IrO<sub>2</sub>NR, C-IrO<sub>2</sub> and C-Ir/C.**

| <b>Material</b>                                | <b>IrO<sub>2</sub>NR</b> | <b>IrO<sub>2</sub>NS</b> | <b>C-IrO<sub>2</sub></b> | <b>C-Ir/C</b> |
|------------------------------------------------|--------------------------|--------------------------|--------------------------|---------------|
| <b>BET area / m<sup>2</sup> g<sup>-1</sup></b> | 47.3                     | 22.0                     | 11.8                     | 397.6         |
| <b>ECSA / m<sup>2</sup> g<sup>-1</sup></b>     | 31.3                     | 21.6                     | 15.5                     | 16.3          |

2

1 **Supplementary Table 3. OER activities of IrO<sub>2</sub>NR, C-IrO<sub>2</sub> and C-Ir/C tested at 1.5 V vs RHE.**

| <b>Material</b>                                                           | <b>IrO<sub>2</sub>NR</b> | <b>IrO<sub>2</sub>NS</b> | <b>C-IrO<sub>2</sub></b> | <b>C-Ir/C</b> |
|---------------------------------------------------------------------------|--------------------------|--------------------------|--------------------------|---------------|
| <b>Overpotential @ 10 mA</b><br><b>cm<sub>geo</sub><sup>-2</sup> / mV</b> | 205                      | 235                      | 303                      | 322           |
| <b>Tafel slope / mV dec<sup>-1</sup></b>                                  | 46.2                     | 54.2                     | 61.2                     | 97.3          |
| <b>Geometric activity / mA</b><br><b>cm<sub>geo</sub><sup>-2</sup></b>    | 456.8                    | 57.4                     | 2.6                      | 2.2           |
| <b>Mass activity /</b><br><b>mA mg<sub>Ir</sub><sup>-1</sup></b>          | 2354.5                   | 295.9                    | 13.4                     | 48.6          |
| <b>Specific activity /</b><br><b>mA cm<sub>BET</sub><sup>-2</sup></b>     | 4.27                     | 1.15                     | 0.1                      | 0.01          |
| <b>Specific activity /</b><br><b>mA cm<sub>ECSA</sub><sup>-2</sup></b>    | 6.45                     | 1.17                     | 0.07                     | 0.3           |
| <b>TOF<sub>BET</sub> / s<sub>BET</sub><sup>-1</sup></b>                   | 9.27                     | 3.10                     | 0.15                     | 0.01          |
| <b>TOF<sub>ECSA</sub> / s<sub>ECSA</sub><sup>-1</sup></b>                 | 14.01                    | 3.07                     | 0.12                     | 0.3           |

2

1 **Supplementary Table 4. Comparison of overpotential, Tafel slope and TOF of IrO<sub>2</sub>NR with**  
 2 **previously reported Ir-based catalysts.**

| Catalyst                               | Electrolyte                             | $\eta@10$<br>mA<br>$\text{cm}_{\text{geo}}^{-2} / \text{mV}$ | Tafel<br>slope<br>/ mV<br>$\text{dec}^{-1}$ | Potential<br>at 1 mA<br>$\text{cm}_{\text{BET}}^{-2} /$<br>V | Mass<br>activity<br>/ mA $\text{mg}_{\text{Ir}}^{-1}$<br>@ Potential<br>vs RHE | TOF/ $\text{s}^{-1}$ @<br>Potential<br>vs RHE                             | Ref                  |
|----------------------------------------|-----------------------------------------|--------------------------------------------------------------|---------------------------------------------|--------------------------------------------------------------|--------------------------------------------------------------------------------|---------------------------------------------------------------------------|----------------------|
| <b>IrO<sub>2</sub>NR</b>               | 0.5 M<br>H <sub>2</sub> SO <sub>4</sub> | <b>205</b>                                                   | <b>46.2</b>                                 | <b>1.48</b>                                                  | <b>2354.5@1.50</b><br>V                                                        | <b>9.27@1.50</b><br>V <sup>a</sup><br><b>14.01@1.50</b><br>V <sup>b</sup> | <b>This<br/>work</b> |
| 3%IrO <sub>2</sub> @BCNT               |                                         | 291                                                          | 52                                          | /                                                            | /                                                                              | /                                                                         | 6                    |
| H-Ti@IrO <sub>x</sub>                  |                                         | 277                                                          | 29                                          | 1.58 V@<br>0.04 mA<br>$\text{cm}_{\text{ECSA}}^{-2}$         | 1500@1.58<br>V                                                                 | /                                                                         | 7                    |
| IrRu@Te                                |                                         | 220                                                          | 35                                          | /                                                            | 590@1.50 V                                                                     | /                                                                         | 8                    |
| RuIrO <sub>x</sub>                     |                                         | 233                                                          | 42                                          | /                                                            | /                                                                              | /                                                                         | 9                    |
| Rh <sub>22</sub> Ir <sub>78</sub> /VXC |                                         | 292                                                          | 101                                         | /                                                            | 1174@1.53<br>V                                                                 | 5.095@1.53<br>V <sup>b</sup>                                              | 10                   |
| Li-IrO <sub>x</sub>                    |                                         | 300                                                          | 39                                          | 1.55                                                         | 1000@1.575<br>V                                                                | 0.31@1.53<br>V <sup>a</sup>                                               | 11                   |
| IrO <sub>x</sub> on IrCo               |                                         | 247                                                          | 49                                          | /                                                            | /                                                                              | /                                                                         | 12                   |
| IrO <sub>2</sub> /GCN                  |                                         | 278                                                          | 57                                          | /                                                            | 1280@1.60<br>V                                                                 | 0.175@1.60<br>V <sup>d</sup>                                              | 13                   |
| Ru@IrO <sub>x</sub>                    |                                         | 282                                                          | 69.1                                        | /                                                            | 644.8@1.56<br>V                                                                | /                                                                         | 14                   |
| Ir nanosheets                          |                                         | 240                                                          | 49                                          | /                                                            | 260@1.50 V                                                                     | /                                                                         | 15                   |
| 6H-SrIrO <sub>3</sub>                  |                                         | 248                                                          | /                                           | 1.55                                                         | 75@1.525 V                                                                     | /                                                                         | 16                   |
| Ir/GF                                  |                                         | 290                                                          | 46                                          | /                                                            | 200@1.62 V                                                                     | /                                                                         | 17                   |
| IrO <sub>2</sub> /CNT                  |                                         | 293                                                          | 67                                          | /                                                            | 11.2@1.53 V                                                                    | /                                                                         | 18                   |
| IrCoNi/CFP                             |                                         | 303                                                          | 54                                          | /                                                            | 750@1.53 V                                                                     | 0.26@1.53<br>V <sup>a</sup>                                               | 19                   |
| IrO <sub>2</sub> -RuO <sub>2</sub> @Ru |                                         | 281                                                          | 53.1                                        | /                                                            | /                                                                              | 0.039@1.55<br>V <sup>d</sup>                                              | 20                   |
| IrO <sub>x</sub> -Ir                   |                                         | 290                                                          | ~44                                         | /                                                            | 100@1.53 V                                                                     | ~1.1@1.53<br>V <sup>b</sup>                                               | 21                   |
| IrO <sub>x</sub> /SrIrO <sub>3</sub>   |                                         | 270                                                          | /                                           | 1.47                                                         | /                                                                              | /                                                                         | 22                   |
| IrNiO <sub>x</sub>                     |                                         | /                                                            | /                                           | /                                                            | 676@1.53 V                                                                     | /                                                                         | 23                   |
| La <sub>2</sub> LiIrO <sub>6</sub>     |                                         | /                                                            | /                                           | /                                                            | ~13@1.50 V                                                                     | /                                                                         | 24                   |
| 1T-IrO <sub>2</sub>                    |                                         | 235                                                          | 49                                          | /                                                            | 152@1.50 V                                                                     | 2.0@1.50<br>V <sup>b</sup>                                                | 2                    |
| ultrathin iridium                      |                                         | 328                                                          | 45.4                                        | /                                                            | 209@1.53 V                                                                     | /                                                                         | 25                   |

|                                                        |                                          |      |      |                                                          |                  |                             |    |
|--------------------------------------------------------|------------------------------------------|------|------|----------------------------------------------------------|------------------|-----------------------------|----|
| nanosheets                                             |                                          |      |      |                                                          |                  |                             |    |
| S-doped<br>M-SrIrO <sub>3</sub><br>nanosheets          |                                          | 228  | 58.4 | /                                                        | 41.5@1.55 V      | /                           | 26 |
| Ir nanosheets                                          |                                          | 254  | 72.5 | /                                                        | 1200@1.55<br>V   | 0.25@1.56<br>V <sup>c</sup> | 27 |
| Mesoporous<br>IrOx<br>nanosheets                       |                                          | ~250 | 47   | /                                                        | ~1300@1.55<br>V  | /                           | 28 |
| IrO <sub>2</sub><br>nanoneedles                        | 1 M H <sub>2</sub> SO <sub>4</sub>       | 313  | 57   | 1.55<br>V@0.03<br>mA<br>cm <sub>ECSA</sub> <sup>-2</sup> | 51.6@1.55 V      | /                           | 29 |
| Ir<br>nanodendrites                                    | 0.05 M<br>H <sub>2</sub> SO <sub>4</sub> | 400  | 56   | 1.57                                                     | 100@1.52V        | /                           | 30 |
| 3R-IrO <sub>2</sub>                                    |                                          | 188  | 52   | /                                                        | 690.4@1.50<br>V  | 5.7@1.50<br>V <sup>b</sup>  | 31 |
| SrCo <sub>0.9</sub> Ir <sub>0.1</sub> O <sub>3-δ</sub> |                                          | ~290 | /    | 1.56<br>V@10<br>mA<br>cm <sub>BET</sub> <sup>-2</sup>    | /                | 2.56@1.50<br>V <sup>a</sup> | 32 |
| IrNiCu<br>double-layered<br>nanoframe                  | 0.1 M<br>HClO <sub>4</sub>               | ~303 | 48   | /                                                        | 120@1.50 V       | /                           | 33 |
| Y <sub>2</sub> Ir <sub>2</sub> O <sub>7</sub>          |                                          | /    | 50   | /                                                        | 100@1.54 V       | /                           | 34 |
| H <sub>3.6</sub> IrO <sub>4</sub> ·3.7H <sub>2</sub> O |                                          | /    | /    | 1.51                                                     | /                | /                           | 35 |
| npIrx-NS                                               |                                          | ~300 | ~54  | /                                                        | /                | /                           | 36 |
| Amorphous Ir<br>nanosheets                             |                                          | 255  | 40   | /                                                        | 221.8 @1.53<br>V | 0.16@1.53<br>V <sup>c</sup> | 37 |

1 <sup>a</sup>based on the surface number sites calculated on BET.

2 <sup>b</sup>based on the moles of surface metal atoms on ECSA.

3 <sup>c</sup>based on the total number sites of mass.

4 <sup>d</sup>based on the moles of surface metal atoms in mol.

5

1 **Supplementary Table 5. comparison of BET, ECSA and specific activity of IrO<sub>2</sub>NR with**  
 2 **previously reported Ir-based catalysts.**

| Catalyst                                               | BET /<br>m <sup>2</sup> g <sup>-1</sup> | Specific activity<br>based on BET / mA<br>cm <sub>BET</sub> <sup>-2</sup> | ECSA /<br>m <sup>2</sup> g <sup>-1</sup> | Specific activity<br>based on ECSA /<br>mA cm <sub>ECSA</sub> <sup>-2</sup> | Ref                  |
|--------------------------------------------------------|-----------------------------------------|---------------------------------------------------------------------------|------------------------------------------|-----------------------------------------------------------------------------|----------------------|
| <b>IrO<sub>2</sub>NR</b>                               | <b>47.3</b>                             | <b>1@1.48 V vs RHE<br/>4.3@1.50 V vs RHE</b>                              | <b>31.3</b>                              | <b>1@1.47 V vs RHE<br/>6.4@1.50 V vs RHE</b>                                | <b>This<br/>work</b> |
| H-Ti@IrO <sub>x</sub>                                  | /                                       | /                                                                         | /                                        | 0.04@1.58 V vs<br>RHE                                                       | 7                    |
| Li-IrO <sub>x</sub>                                    | 27                                      | 1@1.55 V vs RHE                                                           | /                                        | ~1@1.53 V vs RHE                                                            | 11                   |
| 6H-SrIrO <sub>3</sub>                                  | 0.3                                     | ~0.03@1.48 V vs<br>RHE                                                    | /                                        | /                                                                           | 16                   |
| 1T-IrO <sub>2</sub>                                    | 21.9                                    | ~1.3@1.55 V vs<br>RHE                                                     | 15.4                                     | ~1.8@1.55 V vs<br>RHE                                                       | 2                    |
| IrO <sub>2</sub> nanoneedles                           | 196.5                                   | 0.031@1.55 V vs<br>RHE                                                    | 205.1                                    | 0.03@1.55 V vs<br>RHE                                                       | 29                   |
| Ir<br>nanodendrites                                    | 39.2                                    | 1@1.57 V vs RHE                                                           | /                                        | /                                                                           | 30                   |
| 3R-IrO <sub>2</sub>                                    | 14.8                                    | ~4.2@1.5 V vs RHE                                                         | 14.0                                     | ~4.21@1.5 V vs<br>RHE                                                       | 31                   |
| SrCo <sub>0.9</sub> Ir <sub>0.1</sub> O <sub>3-δ</sub> | 0.175                                   | ~1@1.48 V vs RHE                                                          | /                                        | /                                                                           | 32                   |
| H <sub>3.6</sub> IrO <sub>4</sub> ·3.7H <sub>2</sub> O | 4.01                                    | 1@1.51 V vs RHE                                                           | /                                        | /                                                                           | 35                   |

3

1 **Supplementary Table 6. ICP-MS results of IrO<sub>2</sub>NR under different current densities and**  
 2 **potentials for 3600 s.**

|                           | <b>Current density / mA cm<sup>-2</sup></b> |             |             |             | <b>Potential / V vs. RHE</b> |             |             |             |
|---------------------------|---------------------------------------------|-------------|-------------|-------------|------------------------------|-------------|-------------|-------------|
|                           | <b>10</b>                                   | <b>20</b>   | <b>50</b>   | <b>100</b>  | <b>1.40</b>                  | <b>1.45</b> | <b>1.50</b> | <b>1.55</b> |
| Concentration of Ir (ppb) | 0.107                                       | 0.255       | 0.616       | 1.378       | 0.009                        | 0.067       | 0.362       | 1.128       |
| nO <sub>2</sub> (μmol)    | 94.2                                        | 186.6       | 467.0       | 948.8       | 7.1                          | 47.9        | 258.4       | 689.1       |
| S-number                  | 160501<br>6                                 | 133467<br>1 | 138292<br>1 | 125587<br>4 | 162867<br>2                  | 138545<br>4 | 136983<br>7 | 117258<br>2 |

3

1 **Supplementary Table 7. ZPVEs and entropic correction at 300 K.**

|                 | <b>H<sub>2</sub>O</b> | <b>H<sub>2</sub></b> | <b>*O</b> | <b>*OH</b> | <b>*OOH</b> |
|-----------------|-----------------------|----------------------|-----------|------------|-------------|
| ZPVE (eV)       | 0.60                  | 0.30                 | 0.07      | 0.37       | 0.46        |
| $\Delta S$ (eV) | 0.59                  | 0.41                 | 0.09      | 0.12       | 0.16        |

2

1 **Supplementary Notes**

2 **Supplementary Note 1. The simulated coordinates for IrO<sub>2</sub>NR.**

3 01-sub

4 O Ir

|   |                     |                    |                     |  |  |  |
|---|---------------------|--------------------|---------------------|--|--|--|
| 5 | 1.0000000000000000  |                    |                     |  |  |  |
| 6 | 15.0000000000000000 | 0.0000000000000000 | 0.0000000000000000  |  |  |  |
| 7 | 0.0000000000000000  | 5.4324110000000001 | 0.0000000000000000  |  |  |  |
| 8 | 0.0000000000000000  | 0.0000000000000000 | 25.9223649999999992 |  |  |  |

9 O Ir

10 19 8

11 Selective dynamics

12 Direct

|    |                     |                     |                     |   |   |   |
|----|---------------------|---------------------|---------------------|---|---|---|
| 13 | 0.41906500000000034 | 0.25794799999999990 | 0.02596400000000019 | F | F | F |
| 14 | 0.41906500000000034 | 0.92384899999999970 | 0.12480999999999965 | F | F | F |
| 15 | 0.4471198203822812  | 0.6545491573385520  | 0.2340191417309872  | T | T | T |
| 16 | 0.4733495942004957  | 0.4099674867967978  | 0.3457988609085443  | T | T | T |
| 17 | 0.4510552718603226  | 0.1375283621595616  | 0.4332698356881374  | T | T | T |
| 18 | 0.41906500000000034 | 0.75794799999999990 | 0.02596400000000019 | F | F | F |
| 19 | 0.41906500000000034 | 0.42384899999999970 | 0.12480999999999965 | F | F | F |
| 20 | 0.4422174904000905  | 0.1574790054584634  | 0.2325569340693466  | T | T | T |
| 21 | 0.4620263186325192  | 0.9051790564068785  | 0.3406259311725576  | T | T | T |
| 22 | 0.58093499999999966 | 0.08303399999999978 | 0.00000000000000000 | F | F | F |
| 23 | 0.58093499999999966 | 0.74893600000000005 | 0.09884600000000018 | F | F | F |
| 24 | 0.58093499999999966 | 0.41483800000000031 | 0.19769300000000010 | F | F | F |
| 25 | 0.5995550574035357  | 0.1514906889058718  | 0.3109581747931270  | T | T | T |
| 26 | 0.6251726828718004  | 0.9164016834594557  | 0.4147991366877084  | T | T | T |
| 27 | 0.58093499999999966 | 0.58303399999999978 | 0.00000000000000000 | F | F | F |
| 28 | 0.58093499999999966 | 0.24893600000000005 | 0.09884600000000018 | F | F | F |
| 29 | 0.58093499999999966 | 0.91483800000000031 | 0.19769200000000035 | F | F | F |
| 30 | 0.5992910936771227  | 0.6625385755164241  | 0.3085092669953869  | T | T | T |
| 31 | 0.6136816569837211  | 0.4032003522254856  | 0.4074041802867656  | T | T | T |
| 32 | 0.50000000000000000 | 0.50344199999999997 | 0.06240499999999983 | F | F | F |
| 33 | 0.50000000000000000 | 0.16934299999999978 | 0.16125100000000000 | F | F | F |
| 34 | 0.5220876905389951  | 0.9165325830657767  | 0.2704034770555377  | T | T | T |
| 35 | 0.5465663529252881  | 0.6799750677583399  | 0.3792005652002331  | T | T | T |
| 36 | 0.50000000000000000 | 0.00344199999999997 | 0.06240499999999983 | F | F | F |
| 37 | 0.50000000000000000 | 0.66934299999999978 | 0.16125100000000000 | F | F | F |
| 38 | 0.5240494336193062  | 0.4007618178081752  | 0.2718000858633810  | T | T | T |
| 39 | 0.5386840228307030  | 0.1397281512224765  | 0.3865812420588636  | T | T | T |

40

41 02-OH

42 H O Ir

43 1.0000000000000000



|    |                    |                    |                    |   |   |   |
|----|--------------------|--------------------|--------------------|---|---|---|
| 1  | 15.000000000000000 | 0.000000000000000  | 0.000000000000000  |   |   |   |
| 2  | 0.000000000000000  | 5.432411000000001  | 0.000000000000000  |   |   |   |
| 3  | 0.000000000000000  | 0.000000000000000  | 25.922364999999992 |   |   |   |
| 4  | H                  | O                  | Ir                 |   |   |   |
| 5  | 1                  | 20                 | 8                  |   |   |   |
| 6  | Selective dynamics |                    |                    |   |   |   |
| 7  | Direct             |                    |                    |   |   |   |
| 8  | 0.4869046722266670 | 0.6796695669154855 | 0.4734471476813779 | T | T | T |
| 9  | 0.4190650000000034 | 0.2579479999999990 | 0.0259640000000019 | F | F | F |
| 10 | 0.4190650000000034 | 0.9238489999999970 | 0.1248099999999965 | F | F | F |
| 11 | 0.4493551104986169 | 0.6538115026585298 | 0.2352068924827673 | T | T | T |
| 12 | 0.4685265947716387 | 0.4032705463194092 | 0.3444880126933831 | T | T | T |
| 13 | 0.4460404200917793 | 0.1281450585898191 | 0.4336860409467891 | T | T | T |
| 14 | 0.4190650000000034 | 0.7579479999999990 | 0.0259640000000019 | F | F | F |
| 15 | 0.4190650000000034 | 0.4238489999999970 | 0.1248099999999965 | F | F | F |
| 16 | 0.4391142014764139 | 0.1564624534972288 | 0.2315223094660780 | T | T | T |
| 17 | 0.4559209689777723 | 0.9089744956201233 | 0.3396461914434053 | T | T | T |
| 18 | 0.5809349999999966 | 0.0830339999999978 | 0.0000000000000000 | F | F | F |
| 19 | 0.5809349999999966 | 0.7489360000000005 | 0.0988460000000018 | F | F | F |
| 20 | 0.5809349999999966 | 0.4148380000000031 | 0.1976930000000010 | F | F | F |
| 21 | 0.5991559407180789 | 0.1494965021496423 | 0.3113624108423823 | T | T | T |
| 22 | 0.6159069397987182 | 0.9099919555610447 | 0.4173677061722748 | T | T | T |
| 23 | 0.5809349999999966 | 0.5830339999999978 | 0.0000000000000000 | F | F | F |
| 24 | 0.5809349999999966 | 0.2489360000000005 | 0.0988460000000018 | F | F | F |
| 25 | 0.5809349999999966 | 0.9148380000000031 | 0.1976920000000035 | F | F | F |
| 26 | 0.5930621796413594 | 0.6606447617978193 | 0.3061233218646185 | T | T | T |
| 27 | 0.6056735869717875 | 0.4017952874591937 | 0.4077403919680206 | T | T | T |
| 28 | 0.4537724124361938 | 0.6764993969329485 | 0.4406407748655715 | T | T | T |
| 29 | 0.5000000000000000 | 0.5034419999999997 | 0.0624049999999983 | F | F | F |
| 30 | 0.5000000000000000 | 0.1693429999999978 | 0.1612510000000000 | F | F | F |
| 31 | 0.5201963175305339 | 0.9235384113552986 | 0.2702674644800035 | T | T | T |
| 32 | 0.5345665558677728 | 0.6780359439945117 | 0.3807995373832371 | T | T | T |
| 33 | 0.5000000000000000 | 0.0034419999999997 | 0.0624049999999983 | F | F | F |
| 34 | 0.5000000000000000 | 0.6693429999999978 | 0.1612510000000000 | F | F | F |
| 35 | 0.5228683837382202 | 0.3909902872523834 | 0.2716706941679512 | T | T | T |
| 36 | 0.5331267307575491 | 0.1336485933205033 | 0.3863388366432710 | T | T | T |
| 37 |                    |                    |                    |   |   |   |
| 38 | 03-O               |                    |                    |   |   |   |
| 39 | O Ir               |                    |                    |   |   |   |
| 40 | 1.000000000000000  |                    |                    |   |   |   |
| 41 | 15.000000000000000 | 0.000000000000000  | 0.000000000000000  |   |   |   |
| 42 | 0.000000000000000  | 5.432411000000001  | 0.000000000000000  |   |   |   |
| 43 | 0.000000000000000  | 0.000000000000000  | 25.922364999999992 |   |   |   |
| 44 | O                  | Ir                 |                    |   |   |   |

|    |                    |                    |                    |   |   |   |
|----|--------------------|--------------------|--------------------|---|---|---|
| 1  | 20                 | 8                  |                    |   |   |   |
| 2  | Selective dynamics |                    |                    |   |   |   |
| 3  | Direct             |                    |                    |   |   |   |
| 4  | 0.4190650000000034 | 0.2579479999999990 | 0.0259640000000019 | F | F | F |
| 5  | 0.4190650000000034 | 0.9238489999999970 | 0.1248099999999965 | F | F | F |
| 6  | 0.4506213435184632 | 0.6568840874230705 | 0.2358826528955412 | T | T | T |
| 7  | 0.4674781563964113 | 0.4017191746660626 | 0.3431075694857109 | T | T | T |
| 8  | 0.4573671385236630 | 0.1513213230981630 | 0.4375853242497879 | T | T | T |
| 9  | 0.4190650000000034 | 0.7579479999999990 | 0.0259640000000019 | F | F | F |
| 10 | 0.4190650000000034 | 0.4238489999999970 | 0.1248099999999965 | F | F | F |
| 11 | 0.4395338541121853 | 0.1561349346689531 | 0.2316806931647079 | T | T | T |
| 12 | 0.4624684101476215 | 0.9142992000138565 | 0.3413876735687739 | T | T | T |
| 13 | 0.4583247969381578 | 0.6599673983021526 | 0.4360430519211883 | T | T | T |
| 14 | 0.5809349999999966 | 0.0830339999999978 | 0.0000000000000000 | F | F | F |
| 15 | 0.5809349999999966 | 0.7489360000000005 | 0.0988460000000018 | F | F | F |
| 16 | 0.5809349999999966 | 0.4148380000000031 | 0.1976930000000010 | F | F | F |
| 17 | 0.6016265308471409 | 0.1554368935451549 | 0.3102450175213794 | T | T | T |
| 18 | 0.6223036866206140 | 0.9052844807512053 | 0.4086612247496957 | T | T | T |
| 19 | 0.5809349999999966 | 0.5830339999999978 | 0.0000000000000000 | F | F | F |
| 20 | 0.5809349999999966 | 0.2489360000000005 | 0.0988460000000018 | F | F | F |
| 21 | 0.5809349999999966 | 0.9148380000000031 | 0.1976920000000035 | F | F | F |
| 22 | 0.5909188039156626 | 0.6596605627479961 | 0.3051418404574474 | T | T | T |
| 23 | 0.6194287127516339 | 0.4086377767262041 | 0.4051088904614694 | T | T | T |
| 24 | 0.5000000000000000 | 0.5034419999999997 | 0.0624049999999983 | F | F | F |
| 25 | 0.5000000000000000 | 0.1693429999999978 | 0.1612510000000000 | F | F | F |
| 26 | 0.5217444420812252 | 0.9276692841804395 | 0.2709750305103393 | T | T | T |
| 27 | 0.5371201908335426 | 0.6632725168640359 | 0.3840989215630520 | T | T | T |
| 28 | 0.5000000000000000 | 0.0034419999999997 | 0.0624049999999983 | F | F | F |
| 29 | 0.5000000000000000 | 0.6693429999999978 | 0.1612510000000000 | F | F | F |
| 30 | 0.5224513120508993 | 0.3900244917680420 | 0.2712175215135299 | T | T | T |
| 31 | 0.5376182709382881 | 0.1512397974224304 | 0.3867738537579117 | T | T | T |

|    |                     |                    |                     |  |  |  |
|----|---------------------|--------------------|---------------------|--|--|--|
| 32 |                     |                    |                     |  |  |  |
| 33 | 04-OOH              |                    |                     |  |  |  |
| 34 | H O Ir              |                    |                     |  |  |  |
| 35 | 1.0000000000000000  |                    |                     |  |  |  |
| 36 | 15.0000000000000000 | 0.0000000000000000 | 0.0000000000000000  |  |  |  |
| 37 | 0.0000000000000000  | 5.4324110000000001 | 0.0000000000000000  |  |  |  |
| 38 | 0.0000000000000000  | 0.0000000000000000 | 25.9223649999999992 |  |  |  |

|    |                    |                    |                    |   |   |   |
|----|--------------------|--------------------|--------------------|---|---|---|
| 39 | H                  | O                  | Ir                 |   |   |   |
| 40 | 1                  | 21                 | 8                  |   |   |   |
| 41 | Selective dynamics |                    |                    |   |   |   |
| 42 | Direct             |                    |                    |   |   |   |
| 43 | 0.4720329614738420 | 0.6464561274848877 | 0.5173192365208771 | T | T | T |
| 44 | 0.4190650000000034 | 0.2579479999999990 | 0.0259640000000019 | F | F | F |

|    |                    |                    |                    |   |   |   |
|----|--------------------|--------------------|--------------------|---|---|---|
| 1  | 0.4190650000000034 | 0.9238489999999970 | 0.1248099999999965 | F | F | F |
| 2  | 0.4480437220497948 | 0.6550524967693305 | 0.2344693105191512 | T | T | T |
| 3  | 0.4715672711257574 | 0.4091725904050069 | 0.3448848023231698 | T | T | T |
| 4  | 0.4494696992809179 | 0.1443702587225965 | 0.4328245565288801 | T | T | T |
| 5  | 0.4190650000000034 | 0.7579479999999990 | 0.0259640000000019 | F | F | F |
| 6  | 0.4190650000000034 | 0.4238489999999970 | 0.1248099999999965 | F | F | F |
| 7  | 0.4407871240435655 | 0.1582154797030442 | 0.2319743664960739 | T | T | T |
| 8  | 0.4602890615263362 | 0.9094940953218242 | 0.3402952235302220 | T | T | T |
| 9  | 0.5809349999999966 | 0.0830339999999978 | 0.0000000000000000 | F | F | F |
| 10 | 0.5809349999999966 | 0.7489360000000005 | 0.0988460000000018 | F | F | F |
| 11 | 0.5809349999999966 | 0.4148380000000031 | 0.1976930000000010 | F | F | F |
| 12 | 0.5997887931942437 | 0.1520144686175755 | 0.3108272481400659 | T | T | T |
| 13 | 0.6231902310863675 | 0.9174138219553138 | 0.4141971464961759 | T | T | T |
| 14 | 0.5809349999999966 | 0.5830339999999978 | 0.0000000000000000 | F | F | F |
| 15 | 0.5809349999999966 | 0.2489360000000005 | 0.0988460000000018 | F | F | F |
| 16 | 0.5809349999999966 | 0.9148380000000031 | 0.1976920000000035 | F | F | F |
| 17 | 0.5976084005880233 | 0.6642132219336677 | 0.3075249493112006 | T | T | T |
| 18 | 0.6135707822523041 | 0.4033430571898000 | 0.4065116086074406 | T | T | T |
| 19 | 0.5185462945748707 | 0.6465715389818154 | 0.4898291958197232 | T | T | T |
| 20 | 0.4678132550128926 | 0.6707265026463550 | 0.4454923420111937 | T | T | T |
| 21 | 0.5000000000000000 | 0.5034419999999997 | 0.0624049999999983 | F | F | F |
| 22 | 0.5000000000000000 | 0.1693429999999978 | 0.1612510000000000 | F | F | F |
| 23 | 0.5215581759085860 | 0.9199915717490112 | 0.2704639004679797 | T | T | T |
| 24 | 0.5410569529877362 | 0.6781303171646037 | 0.3811651948603809 | T | T | T |
| 25 | 0.5000000000000000 | 0.0034419999999997 | 0.0624049999999983 | F | F | F |
| 26 | 0.5000000000000000 | 0.6693429999999978 | 0.1612510000000000 | F | F | F |
| 27 | 0.5240942114161827 | 0.3988690320131885 | 0.2717791338671527 | T | T | T |
| 28 | 0.5375125698806702 | 0.1415826832235977 | 0.3860381793981448 | T | T | T |
| 29 |                    |                    |                    |   |   |   |
| 30 |                    |                    |                    |   |   |   |

1 **Supplementary Note 2. The simulated coordinates for Rutile IrO<sub>2</sub>.**

2 01-sub

3 O Ir

4 1.0000000000000000

5 6.3790139999999997 0.0000000000000000 0.0000000000000000

6 0.0000000000000000 6.4275140000000004 0.0000000000000000

7 0.0000000000000000 0.0000000000000000 27.1048849999999995

8 O Ir

9 33 16

10 Selective dynamics

11 Direct

12 0.0000000000000000 0.5000000000000000 0.1127090000000024 F F F

13 0.0000000000000000 0.0000000000000000 0.2312760000000011 F F F

14 0.9998445680351926 0.5010017369335630 0.3521987881139923 T T T

15 0.9994965058634052 0.0016695960319556 0.4694566958742364 T T T

16 0.0000000000000000 0.5000000000000000 0.0218169999999986 F F F

17 0.0000000000000000 0.0000000000000000 0.1403839999999974 F F F

18 0.9998819793757620 0.5008972018637352 0.2594521381489161 T T T

19 0.9996259223036761 0.0019192165512308 0.3788791698653289 T T T

20 0.2500000000000000 0.8083540000000013 0.0672629999999970 F F F

21 0.2500000000000000 0.3083540000000013 0.1858300000000028 F F F

22 0.2494157646963543 0.8090788817774327 0.3055969149996448 T T T

23 0.2495907823033064 0.3106286536138581 0.4253387398246818 T T T

24 0.2500000000000000 0.1916459999999987 0.0672629999999970 F F F

25 0.2500000000000000 0.6916459999999987 0.1858300000000028 F F F

26 0.2493828154747827 0.1929000641092782 0.3054636508096125 T T T

27 0.2495815292875117 0.6930558945980061 0.4250517030320726 T T T

28 0.5000000000000000 0.5000000000000000 0.1127090000000024 F F F

29 0.5000000000000000 0.0000000000000000 0.2312760000000011 F F F

30 0.4998198059594037 0.5007391366584167 0.3505882334525952 T T T

31 0.4995544737545041 0.0014153080660952 0.4696174333714332 T T T

32 0.5000000000000000 0.5000000000000000 0.0218169999999986 F F F

33 0.5000000000000000 0.0000000000000000 0.1403839999999974 F F F

34 0.4998843037734757 0.5008953976136499 0.2596797790019997 T T T

35 0.4995913062981768 0.0018333004320948 0.3790363607518746 T T T

36 0.7500000000000000 0.8083540000000013 0.0672629999999970 F F F

37 0.7500000000000000 0.3083540000000013 0.1858300000000028 F F F

38 0.7502442101018467 0.8091002149315418 0.3056004516223246 T T T

39 0.7494529891548373 0.3106332557036335 0.4253109183090793 T T T

40 0.7500000000000000 0.1916459999999987 0.0672629999999970 F F F

41 0.7500000000000000 0.6916459999999987 0.1858300000000028 F F F

42 0.7502852598433740 0.1929070926387134 0.3054594489419337 T T T

43 0.7494504559824992 0.6930585580597578 0.4250282178903759 T T T

44 0.9992729854811668 0.5034711991814431 0.4964397147839072 T T T

|    |                    |                    |                    |   |   |   |
|----|--------------------|--------------------|--------------------|---|---|---|
| 1  | 0.2500000000000000 | 0.5000000000000000 | 0.0672629999999970 | F | F | F |
| 2  | 0.2500000000000000 | 0.0000000000000000 | 0.1858300000000028 | F | F | F |
| 3  | 0.2475069015541578 | 0.5009915241560096 | 0.3054876608785878 | T | T | T |
| 4  | 0.2492901012064446 | 0.0017640358393325 | 0.4252172614315575 | T | T | T |
| 5  | 0.0000000000000000 | 0.0000000000000000 | 0.0672629999999970 | F | F | F |
| 6  | 0.0000000000000000 | 0.5000000000000000 | 0.1858300000000028 | F | F | F |
| 7  | 0.9998254840168888 | 0.0009951528151384 | 0.3055600425645030 | T | T | T |
| 8  | 0.9995095101943213 | 0.5019398334215505 | 0.4296801104279055 | T | T | T |
| 9  | 0.7500000000000000 | 0.5000000000000000 | 0.0672629999999970 | F | F | F |
| 10 | 0.7500000000000000 | 0.0000000000000000 | 0.1858300000000028 | F | F | F |
| 11 | 0.7522189572992751 | 0.5009991211868521 | 0.3054923822539625 | T | T | T |
| 12 | 0.7498078830423235 | 0.0017579660655349 | 0.4252075578576048 | T | T | T |
| 13 | 0.5000000000000000 | 0.0000000000000000 | 0.0672629999999970 | F | F | F |
| 14 | 0.5000000000000000 | 0.5000000000000000 | 0.1858300000000028 | F | F | F |
| 15 | 0.4998190680808338 | 0.0009988354452719 | 0.3056387029642698 | T | T | T |
| 16 | 0.4995109677516775 | 0.5018519584487785 | 0.4217974338177495 | T | T | T |

17

18 02-OH

19 H O Ir

|    |                    |                    |                     |  |  |  |
|----|--------------------|--------------------|---------------------|--|--|--|
| 20 | 1.0000000000000000 |                    |                     |  |  |  |
| 21 | 6.3790139999999997 | 0.0000000000000000 | 0.0000000000000000  |  |  |  |
| 22 | 0.0000000000000000 | 6.4275140000000004 | 0.0000000000000000  |  |  |  |
| 23 | 0.0000000000000000 | 0.0000000000000000 | 27.1048849999999995 |  |  |  |

24 H O Ir  
25 1 34 16

26 Selective dynamics

27 Direct

|    |                     |                    |                    |   |   |   |
|----|---------------------|--------------------|--------------------|---|---|---|
| 28 | 0.6338218103958381  | 0.5067305354378833 | 0.5109118083149641 | T | T | T |
| 29 | 0.0000000000000000  | 0.5000000000000000 | 0.1127090000000024 | F | F | F |
| 30 | 0.0000000000000000  | 0.0000000000000000 | 0.2312760000000011 | F | F | F |
| 31 | 0.0002115946427766  | 0.5006692981053429 | 0.3518085521966868 | T | T | T |
| 32 | -0.0006099061285491 | 0.0012056575053149 | 0.4693501256153819 | T | T | T |
| 33 | 0.0000000000000000  | 0.5000000000000000 | 0.0218169999999986 | F | F | F |
| 34 | 0.0000000000000000  | 0.0000000000000000 | 0.1403839999999974 | F | F | F |
| 35 | -0.0001616623193010 | 0.5005377364994646 | 0.2597714134179485 | T | T | T |
| 36 | -0.0001995536195784 | 0.0014122165233374 | 0.3789067445012633 | T | T | T |
| 37 | 0.2500000000000000  | 0.8083540000000013 | 0.0672629999999970 | F | F | F |
| 38 | 0.2500000000000000  | 0.3083540000000013 | 0.1858300000000028 | F | F | F |
| 39 | 0.2498668038117612  | 0.8087345875183251 | 0.3053588169655004 | T | T | T |
| 40 | 0.2491681853642929  | 0.3099691856292135 | 0.4247271754293133 | T | T | T |
| 41 | 0.2500000000000000  | 0.1916459999999987 | 0.0672629999999970 | F | F | F |
| 42 | 0.2500000000000000  | 0.6916459999999987 | 0.1858300000000028 | F | F | F |
| 43 | 0.2498793038273987  | 0.1926416531991275 | 0.3052695071543272 | T | T | T |
| 44 | 0.2492589770498049  | 0.6928085795571646 | 0.4244340201172746 | T | T | T |

|    |                     |                    |                    |   |   |   |
|----|---------------------|--------------------|--------------------|---|---|---|
| 1  | 0.5000000000000000  | 0.5000000000000000 | 0.1127090000000024 | F | F | F |
| 2  | 0.5000000000000000  | 0.0000000000000000 | 0.2312760000000011 | F | F | F |
| 3  | 0.4996246563607662  | 0.5007058506002751 | 0.3512755880197697 | T | T | T |
| 4  | 0.5000965351963679  | 0.0011627109843875 | 0.4692013539045547 | T | T | T |
| 5  | 0.5000000000000000  | 0.5000000000000000 | 0.0218169999999986 | F | F | F |
| 6  | 0.5000000000000000  | 0.0000000000000000 | 0.1403839999999974 | F | F | F |
| 7  | 0.5001122421505795  | 0.5006116887766602 | 0.2596781999178207 | T | T | T |
| 8  | 0.4995845123596138  | 0.0014303246404307 | 0.3789413676719597 | T | T | T |
| 9  | 0.7500000000000000  | 0.8083540000000013 | 0.0672629999999970 | F | F | F |
| 10 | 0.7500000000000000  | 0.3083540000000013 | 0.1858300000000028 | F | F | F |
| 11 | 0.7500473298671265  | 0.8087843372403861 | 0.3053729732162634 | T | T | T |
| 12 | 0.7503705996796457  | 0.3097062221571728 | 0.4240462945554899 | T | T | T |
| 13 | 0.7500000000000000  | 0.1916459999999987 | 0.0672629999999970 | F | F | F |
| 14 | 0.7500000000000000  | 0.6916459999999987 | 0.1858300000000028 | F | F | F |
| 15 | 0.7500577850612676  | 0.1926522401496229 | 0.3052822621686517 | T | T | T |
| 16 | 0.7504789256230621  | 0.6930821964265689 | 0.4238444840446888 | T | T | T |
| 17 | 0.9919481473566180  | 0.5024887867277223 | 0.4953921166567681 | T | T | T |
| 18 | 0.4916258834264045  | 0.5026283776001284 | 0.4972301991872556 | T | T | T |
| 19 | 0.2500000000000000  | 0.5000000000000000 | 0.0672629999999970 | F | F | F |
| 20 | 0.2500000000000000  | 0.0000000000000000 | 0.1858300000000028 | F | F | F |
| 21 | 0.2496574493718979  | 0.5006550766711961 | 0.3055484969244238 | T | T | T |
| 22 | 0.2493632091686847  | 0.0013633269078379 | 0.4252728188657499 | T | T | T |
| 23 | 0.0000000000000000  | 0.0000000000000000 | 0.0672629999999970 | F | F | F |
| 24 | 0.0000000000000000  | 0.5000000000000000 | 0.1858300000000028 | F | F | F |
| 25 | -0.0000243257944562 | 0.0007067859798631 | 0.3055622792645232 | T | T | T |
| 26 | 0.0003751045719662  | 0.5014558878886503 | 0.4286777017602615 | T | T | T |
| 27 | 0.7500000000000000  | 0.5000000000000000 | 0.0672629999999970 | F | F | F |
| 28 | 0.7500000000000000  | 0.0000000000000000 | 0.1858300000000028 | F | F | F |
| 29 | 0.7503421554100849  | 0.5007302908895575 | 0.3056135304513852 | T | T | T |
| 30 | 0.7499413235432304  | 0.0013226072190987 | 0.4251436777818714 | T | T | T |
| 31 | 0.5000000000000000  | 0.0000000000000000 | 0.0672629999999970 | F | F | F |
| 32 | 0.5000000000000000  | 0.5000000000000000 | 0.1858300000000028 | F | F | F |
| 33 | 0.4999342224940794  | 0.0007045927376406 | 0.3055960218412249 | T | T | T |
| 34 | 0.5004319618172495  | 0.5013785617706408 | 0.4252213354183028 | T | T | T |

35

36 03-O

37 O Ir

|    |                    |                    |                     |
|----|--------------------|--------------------|---------------------|
| 38 | 1.0000000000000000 |                    |                     |
| 39 | 6.3790139999999997 | 0.0000000000000000 | 0.0000000000000000  |
| 40 | 0.0000000000000000 | 6.4275140000000004 | 0.0000000000000000  |
| 41 | 0.0000000000000000 | 0.0000000000000000 | 27.1048849999999995 |

42 O Ir

43 34 16

44 Selective dynamics

|    |                    |                    |                    |   |   |   |
|----|--------------------|--------------------|--------------------|---|---|---|
| 1  | Direct             |                    |                    |   |   |   |
| 2  | 0.0000000000000000 | 0.5000000000000000 | 0.1127090000000024 | F | F | F |
| 3  | 0.0000000000000000 | 0.0000000000000000 | 0.2312760000000011 | F | F | F |
| 4  | 0.9998689644201714 | 0.5009002032862475 | 0.3519682429236804 | T | T | T |
| 5  | 0.9993344891123284 | 0.0018118839891236 | 0.4692436650365079 | T | T | T |
| 6  | 0.0000000000000000 | 0.5000000000000000 | 0.0218169999999986 | F | F | F |
| 7  | 0.0000000000000000 | 0.0000000000000000 | 0.1403839999999974 | F | F | F |
| 8  | 0.9999333076180618 | 0.5008703815970384 | 0.2598442601605263 | T | T | T |
| 9  | 0.9995413867453676 | 0.0020125748078738 | 0.3788676535902920 | T | T | T |
| 10 | 0.2500000000000000 | 0.8083540000000013 | 0.0672629999999970 | F | F | F |
| 11 | 0.2500000000000000 | 0.3083540000000013 | 0.1858300000000028 | F | F | F |
| 12 | 0.2499127295844903 | 0.8088026942427462 | 0.3054991807877735 | T | T | T |
| 13 | 0.2494234004703997 | 0.3105887187729434 | 0.4243089340770135 | T | T | T |
| 14 | 0.2500000000000000 | 0.1916459999999987 | 0.0672629999999970 | F | F | F |
| 15 | 0.2500000000000000 | 0.6916459999999987 | 0.1858300000000028 | F | F | F |
| 16 | 0.2499135989388178 | 0.1932366051173780 | 0.3053566572894766 | T | T | T |
| 17 | 0.2494245778724460 | 0.6934107911073747 | 0.4239175605647564 | T | T | T |
| 18 | 0.5000000000000000 | 0.5000000000000000 | 0.1127090000000024 | F | F | F |
| 19 | 0.5000000000000000 | 0.0000000000000000 | 0.2312760000000011 | F | F | F |
| 20 | 0.4998618233891925 | 0.5009105452674546 | 0.3519674233019505 | T | T | T |
| 21 | 0.4993441147968616 | 0.0018272829415091 | 0.4692435260638592 | T | T | T |
| 22 | 0.5000000000000000 | 0.5000000000000000 | 0.0218169999999986 | F | F | F |
| 23 | 0.5000000000000000 | 0.0000000000000000 | 0.1403839999999974 | F | F | F |
| 24 | 0.4999336059489501 | 0.5008698334069562 | 0.2598441626926167 | T | T | T |
| 25 | 0.4995363575278933 | 0.0020289141258509 | 0.3788676927922908 | T | T | T |
| 26 | 0.7500000000000000 | 0.8083540000000013 | 0.0672629999999970 | F | F | F |
| 27 | 0.7500000000000000 | 0.3083540000000013 | 0.1858300000000028 | F | F | F |
| 28 | 0.7499129015292626 | 0.8088032403638902 | 0.3054996207517020 | T | T | T |
| 29 | 0.7494394270523926 | 0.3105891976385393 | 0.4243026078236614 | T | T | T |
| 30 | 0.7500000000000000 | 0.1916459999999987 | 0.0672629999999970 | F | F | F |
| 31 | 0.7500000000000000 | 0.6916459999999987 | 0.1858300000000028 | F | F | F |
| 32 | 0.7499134914126016 | 0.1932366406207862 | 0.3053565385032874 | T | T | T |
| 33 | 0.7494132118942283 | 0.6934129428582144 | 0.4239109108329677 | T | T | T |
| 34 | 0.9993185444826654 | 0.5037874790445082 | 0.4953276145215443 | T | T | T |
| 35 | 0.4993734011744317 | 0.5036879808826554 | 0.4953242154944987 | T | T | T |
| 36 | 0.2500000000000000 | 0.5000000000000000 | 0.0672629999999970 | F | F | F |
| 37 | 0.2500000000000000 | 0.0000000000000000 | 0.1858300000000028 | F | F | F |
| 38 | 0.2499169030561023 | 0.5009770799872626 | 0.3057677369430566 | T | T | T |
| 39 | 0.2494291759223654 | 0.0019432604995545 | 0.4251638409715845 | T | T | T |
| 40 | 0.0000000000000000 | 0.0000000000000000 | 0.0672629999999970 | F | F | F |
| 41 | 0.0000000000000000 | 0.5000000000000000 | 0.1858300000000028 | F | F | F |
| 42 | 0.9998892883281378 | 0.0010193371458187 | 0.3056226939312163 | T | T | T |
| 43 | 0.9994073756976700 | 0.5021101886134252 | 0.4286552763636916 | T | T | T |
| 44 | 0.7500000000000000 | 0.5000000000000000 | 0.0672629999999970 | F | F | F |

|    |                     |                     |                     |   |   |   |
|----|---------------------|---------------------|---------------------|---|---|---|
| 1  | 0.7500000000000000  | 0.0000000000000000  | 0.1858300000000028  | F | F | F |
| 2  | 0.7499182810285098  | 0.5009796978011276  | 0.3057687879354140  | T | T | T |
| 3  | 0.7494295141586830  | 0.0019447972812111  | 0.4251619733868104  | T | T | T |
| 4  | 0.5000000000000000  | 0.0000000000000000  | 0.0672629999999970  | F | F | F |
| 5  | 0.5000000000000000  | 0.5000000000000000  | 0.1858300000000028  | F | F | F |
| 6  | 0.4998887467097261  | 0.0010207903689170  | 0.3056225398537408  | T | T | T |
| 7  | 0.4994103929723537  | 0.5021007607696568  | 0.4286544999212406  | T | T | T |
| 8  |                     |                     |                     |   |   |   |
| 9  | 04-OOH              |                     |                     |   |   |   |
| 10 | H O Ir              |                     |                     |   |   |   |
| 11 | 1.0000000000000000  |                     |                     |   |   |   |
| 12 | 6.3790139999999997  | 0.0000000000000000  | 0.0000000000000000  |   |   |   |
| 13 | 0.0000000000000000  | 6.4275140000000004  | 0.0000000000000000  |   |   |   |
| 14 | 0.0000000000000000  | 0.0000000000000000  | 27.1048849999999995 |   |   |   |
| 15 | H O Ir              |                     |                     |   |   |   |
| 16 | 1                   | 35                  | 16                  |   |   |   |
| 17 | Selective dynamics  |                     |                     |   |   |   |
| 18 | Direct              |                     |                     |   |   |   |
| 19 | 0.5297212590431493  | 0.4177615828041949  | 0.5609517968202882  | T | T | T |
| 20 | 0.0000000000000000  | 0.5000000000000000  | 0.1127090000000024  | F | F | F |
| 21 | 0.0000000000000000  | 0.0000000000000000  | 0.2312760000000011  | F | F | F |
| 22 | -0.0003451184592728 | 0.4944432468660376  | 0.3519644386127907  | T | T | T |
| 23 | 0.0001882990651607  | -0.0054455271463742 | 0.4691720724593572  | T | T | T |
| 24 | 0.0000000000000000  | 0.5000000000000000  | 0.0218169999999986  | F | F | F |
| 25 | 0.0000000000000000  | 0.0000000000000000  | 0.1403839999999974  | F | F | F |
| 26 | 0.0001276516495146  | 0.4987379466838284  | 0.2597312933866688  | T | T | T |
| 27 | -0.0007298965815942 | -0.0027922360552167 | 0.3787117324938758  | T | T | T |
| 28 | 0.2500000000000000  | 0.8083540000000013  | 0.0672629999999970  | F | F | F |
| 29 | 0.2500000000000000  | 0.3083540000000013  | 0.1858300000000028  | F | F | F |
| 30 | 0.2498096361876740  | 0.8055174447751586  | 0.3054163506269030  | T | T | T |
| 31 | 0.2510967212646291  | 0.3038137292842731  | 0.4248298644130823  | T | T | T |
| 32 | 0.2500000000000000  | 0.1916459999999987  | 0.0672629999999970  | F | F | F |
| 33 | 0.2500000000000000  | 0.6916459999999987  | 0.1858300000000028  | F | F | F |
| 34 | 0.2498905817199911  | 0.1899157653294576  | 0.3053085905288905  | T | T | T |
| 35 | 0.2472976696229873  | 0.6880587838577156  | 0.4228715500751000  | T | T | T |
| 36 | 0.5000000000000000  | 0.5000000000000000  | 0.1127090000000024  | F | F | F |
| 37 | 0.5000000000000000  | 0.0000000000000000  | 0.2312760000000011  | F | F | F |
| 38 | 0.5005286551200049  | 0.4945350070325660  | 0.3515087287865385  | T | T | T |
| 39 | 0.4985998470488681  | -0.0108192852744165 | 0.4689134234697506  | T | T | T |
| 40 | 0.5000000000000000  | 0.5000000000000000  | 0.0218169999999986  | F | F | F |
| 41 | 0.5000000000000000  | 0.0000000000000000  | 0.1403839999999974  | F | F | F |
| 42 | 0.4999508058355370  | 0.4988785258575315  | 0.2597686749591206  | T | T | T |
| 43 | 0.5000766116819096  | -0.0033615787454754 | 0.3787958157552416  | T | T | T |
| 44 | 0.7500000000000000  | 0.8083540000000013  | 0.0672629999999970  | F | F | F |



|    |                     |                     |                    |   |   |   |
|----|---------------------|---------------------|--------------------|---|---|---|
| 1  | 0.7500000000000000  | 0.3083540000000013  | 0.1858300000000028 | F | F | F |
| 2  | 0.7500462242857603  | 0.8049686590591850  | 0.3053428337911113 | T | T | T |
| 3  | 0.7505304900937947  | 0.3037502268207589  | 0.4262380358970056 | T | T | T |
| 4  | 0.7500000000000000  | 0.1916459999999987  | 0.0672629999999970 | F | F | F |
| 5  | 0.7500000000000000  | 0.6916459999999987  | 0.1858300000000028 | F | F | F |
| 6  | 0.7501131133095940  | 0.1893299063095829  | 0.3052318979352714 | T | T | T |
| 7  | 0.7494399131834137  | 0.6866586398525100  | 0.4238359169425996 | T | T | T |
| 8  | 0.0070337350979972  | 0.5026060251618678  | 0.4955031256750325 | T | T | T |
| 9  | 0.5658966608529270  | 0.3662788821623024  | 0.5277136118529102 | T | T | T |
| 10 | 0.4762856737701269  | 0.5268733806416662  | 0.4981488362517004 | T | T | T |
| 11 | 0.2500000000000000  | 0.5000000000000000  | 0.0672629999999970 | F | F | F |
| 12 | 0.2500000000000000  | 0.0000000000000000  | 0.1858300000000028 | F | F | F |
| 13 | 0.2495569599619835  | 0.4978797297798127  | 0.3056818313388325 | T | T | T |
| 14 | 0.2494960075735005  | -0.0046518753176292 | 0.4247810136447266 | T | T | T |
| 15 | 0.0000000000000000  | 0.0000000000000000  | 0.0672629999999970 | F | F | F |
| 16 | 0.0000000000000000  | 0.5000000000000000  | 0.1858300000000028 | F | F | F |
| 17 | -0.0000968684984893 | -0.0024551339087700 | 0.3054452958349328 | T | T | T |
| 18 | -0.0002363537065004 | 0.4958766678608142  | 0.4288260701893173 | T | T | T |
| 19 | 0.7500000000000000  | 0.5000000000000000  | 0.0672629999999970 | F | F | F |
| 20 | 0.7500000000000000  | 0.0000000000000000  | 0.1858300000000028 | F | F | F |
| 21 | 0.7505418782974969  | 0.4967459283923896  | 0.3056142407824793 | T | T | T |
| 22 | 0.7497601130295259  | -0.0042913429674015 | 0.4251003239125429 | T | T | T |
| 23 | 0.5000000000000000  | 0.0000000000000000  | 0.0672629999999970 | F | F | F |
| 24 | 0.5000000000000000  | 0.5000000000000000  | 0.1858300000000028 | F | F | F |
| 25 | 0.4999895325035672  | -0.0024098543549113 | 0.3055359256907156 | T | T | T |
| 26 | 0.4988734466362944  | 0.4958633544827046  | 0.4266112243991225 | T | T | T |
| 27 |                     |                     |                    |   |   |   |

1 **Supplementary Note 3. The code input file.**

2

3 SYSTEM = Opt

4

5 ISYM = 0

6 ISPIN = 2

7

8 PREC = Normal

9 ALGO = FAST

10

11 ENCUT = 520

12 EDIFF = 1E-04

13 EDIFFG = -0.03

14

15 ISMEAR = 0

16 SIGMA = 0.05

17

18 LREAL = Auto

19 LWAVE = .FALSE.

20 LCHARG = .FALSE.

21

22 NSW = 999

23 IBRION = 2

24

25 GGA = RP

26

27

## 1 **Supplementary References**

- 2 1. Geiger, S., Kasian, O., Ledendecker, M., Pizzutilo, E., Mingers, A. M., Fu, W. T., Diaz-Morales,  
3 O., Li, Z. Z., Oellers, T., Fruchter, L., Ludwig, A., Mayrhofer, K. J. J., Koper, M. T. M. & Cherevko,  
4 S. The stability number as a metric for electrocatalyst stability benchmarking. *Nat. Catal.* **1**, 508-515  
5 (2018).
- 6 2. Dang, Q., Lin, H. P., Fan, Z. L., Ma, L., Shao, Q., Ji, Y. J., Zheng, F. F., Geng, S. Z., Yang, S. Z.,  
7 Kong, N. N., Zhu, W. X., Li, Y. Y., Liao, F., Huang, X. Q. & Shao, M. W. Iridium metallene oxide for  
8 acidic oxygen evolution catalysis. *Nat. Commun.* **12**, 6007 (2021).
- 9 3. da Silva, C. D. F., Claudel, F., Martin, V., Chattot, R., Abbou, S., Kumar, K., Jiménez-Morales, I.,  
10 Cavaliere, S., Jones, D., Rozière, J., Solà-Hernandez, L., Beauger, C., Faustini, M., Peron, J., Gilles,  
11 B., Encinas, T., Piccolo, L., Barros de Lima, F. H., Dubau, L. & Maillard, F. Oxygen evolution  
12 reaction activity and stability benchmarks for supported and unsupported IrO<sub>x</sub> electrocatalysts. *ACS*  
13 *Catal.* **11**, 4107-4116 (2021).
- 14 4. Lončar, A., Escalera-López, D., Ruiz-Zepeda, F., Hrnjić, A., Šala, M., Jovanovič, P., Bele, M.,  
15 Cherevko, S. & Hodnik, N. Sacrificial Cu layer mediated the formation of an active and stable  
16 supported iridium oxygen evolution reaction electrocatalyst. *ACS Catal.* **11**, 12510-12519 (2021).
- 17 5. Pham, C. V., Bühler, M., Knöppel, J., Bierling, M., Seeberger, D., Escalera-López, D., Mayrhofer,  
18 K. J. J., Cherevko, S. & Thiele, S. IrO<sub>2</sub> coated TiO<sub>2</sub> core-shell microparticles advance performance of  
19 low loading proton exchange membrane water electrolyzers. *Appl. Catal. B: Environ.* **269**, 118762  
20 (2020).
- 21 6. Liu, N., Duan, Z. Y., Zhang, Q. Q. & Guan, J. Q. Insights into active species of ultrafine iridium  
22 oxide nanoparticle electrocatalysts in hydrogen/oxygen evolution reactions. *Chem. Eng. J.* **419**,  
23 129567 (2021).
- 24 7. Yu, Z. P., Xu, J. Y., Li, Y. F., Wei, B., Zhang, N., Li, Y., Bondarchuk, O., Miao, H. W., Araujo, A.,  
25 Wang, Z. C., Faria, J. L., Liu, Y. Y. & Liu, L. F. Ultrafine oxygen-defective iridium oxide  
26 nanoclusters for efficient and durable water oxidation at high current densities in acidic media. *J.*  
27 *Mater. Chem. A* **8**, 24743-24751 (2020).
- 28 8. Xu, J. Y., Lian, Z., Wei, B., Li, Y., Bondarchuk, O., Zhang, N., Yu, Z. P., Araujo, A., Amorim, I.,  
29 Wang, Z. C., Li, B. & Liu, L. F. Strong electronic coupling between ultrafine iridium-ruthenium

- 1 nanoclusters and conductive, acid-stable tellurium nanoparticle support for efficient and durable  
2 oxygen evolution in acidic and neutral media. *ACS Catal.* **10**, 3571-3579 (2020).
- 3 9. Zhuang, Z. W., Wang, Y., Xu, C. Q., Liu, S. J., Chen, C., Peng, Q., Zhuang, Z. B., Xiao, H., Pan, Y.,  
4 Lu, S. Q. Yu, R., Cheong, W. C., Cao, X., Wu, K. L., Sun, K. A., Wang, Y., Wang, D. S., Li, J. & Li,  
5 Y. D. Three-dimensional open nano-netcage electrocatalysts for efficient pH-universal overall water  
6 splitting. *Nat. Commun.* **10**, 4875 (2019).
- 7 10. Guo, H. Y., Fang, Z. W., Li, H., Fernandez, D., Henkelman, G., Humphrey, S. M. & Yu, G. H.  
8 Rational design of rhodium-iridium alloy nanoparticles as highly active catalysts for acidic oxygen  
9 evolution. *ACS Nano* **13**, 13225-13234 (2019).
- 10 11. Gao, J. J., Xu, C. Q., Hung, S. F., Liu, W., Cai, W. Z., Zeng, Z. P., Jia, C. M., Chen, H. M., Xiao,  
11 H., Li, J., Huang, Y. Q. & Liu, B. Breaking long-range order in iridium oxide by alkali ion for  
12 efficient water oxidation. *J. Am. Chem. Soc.* **141**, 3014-3023 (2019).
- 13 12. Meng, G., Sun, W. M., Mon, A. A., Wu, X., Xia, L. Y., Han, A. J., Wang, Y., Zhuang, Z. B., Liu, J.  
14 F., Wang, D. S. & Li, Y. D. Strain regulation to optimize the acidic water oxidation performance of  
15 atomic-layer IrO<sub>x</sub>. *Adv. Mater.* **31**, 1903616 (2019).
- 16 13. Chen, J. Y., Cui, P. X., Zhao, G. Q., Rui, K., Lao, M. M., Chen, Y. P., Zheng, X. S., Jiang, Y. Z.,  
17 Pan, H. G., Dou, S. X. & Sun, W. P. Low-coordinate iridium oxide confined on graphitic carbon  
18 nitride for highly efficient oxygen evolution. *Angew. Chem. Int. Ed.* **58**, 12540-12544 (2019).
- 19 14. Shan, J. Q., Guo, C. X., Zhu, Y. H., Chen, S. M., Song, L., Jaroniec, M., Zheng, Y. & Qiao, S. Z.  
20 Charge-redistribution-enhanced nanocrystalline Ru@IrO<sub>x</sub> electrocatalysts for oxygen evolution in  
21 acidic media. *Chem* **5**, 445-459 (2019).
- 22 15. Jiang, B., Guo, Y. N., Kim, J., Whitten, A. E., Wook, K., Kani, K., Rowan, A. E., Henzie, J. &  
23 Yamauchi, Y. Mesoporous metallic iridium nanosheets. *J. Am. Chem. Soc.* **140**, 12434-12441 (2018).
- 24 16. Yang, L., Yu, G. T., Ai, X., Yan, W. S., Duan, H. L., Chen, W., Li, X. T., Wang, T., Zhang, C. H.,  
25 Huang, X. R., Chen, J. S. & Zou, X. X. Efficient oxygen evolution electrocatalysis in acid by a  
26 perovskite with face-sharing IrO<sub>6</sub> octahedral dimers. *Nat. Commun.* **9**, 5236 (2018).
- 27 17. Zhang, J., Wang, G., Liao, Z. Q., Zhang, P. P., Wang, F. X., Zhuang, X. D., Zschech, E. & Feng,  
28 X. L. Iridium nanoparticles anchored on 3D graphite foam as a bifunctional electrocatalyst for  
29 excellent overall water splitting in acidic solution. *Nano Energy* **40**, 27-33 (2017).
- 30 18. Guan, J. Q., Li, D., Si, R., Miao, S., Zhang, F. X. & Li, C. Synthesis and demonstration of

- 1 subnanometric iridium oxide as highly efficient and robust water oxidation catalyst. *ACS Catal.* **7**,  
2 5983-5986 (2017).
- 3 19. Feng, J. R., Lv, F., Zhuang, W. Y., Li, P. H., Wang, K., Yang, C., Wang, B., Yang, Y., Zhou, J. H.  
4 & Lin, F. Iridium-based multimetallic porous hollow nanocrystals for efficient overall-water-splitting  
5 catalysis. *Adv. Mater.* **29**, 1703798 (2017).
- 6 20. Li, G. Q., Li, S. T., Ge, J. J., Liu, C. P. & Xing, W. Discontinuously covered IrO<sub>2</sub>-RuO<sub>2</sub>@Ru  
7 electrocatalysts for the oxygen evolution reaction: how high activity and long-term durability can be  
8 simultaneously realized in the synergistic and hybrid nano-structure. *J. Mater. Chem. A* **5**,  
9 17221-17229 (2017).
- 10 21. Lettenmeier, P., Wang, L., Golla-Schindler, U., Gazdzicki, P., Canas, N. A., Handl, M., Hiesgen,  
11 R., Hosseiny, S. S., Gago, A. S. & Friedrich, K. A. Nanosized IrO<sub>x</sub>-Ir catalyst with relevant activity  
12 for anodes of proton exchange membrane electrolysis produced by a cost-effective procedure. *Angew.  
13 Chem. Int. Ed.* **55**, 742-746 (2016).
- 14 22. Seitz, L. C., Dickens, C. F., Nishio, K., Hikita, Y., Montoya, J., Doyle, A., Kirk, C., Vojvodic, A.,  
15 Hwang, H. Y. & Nørskov, J. k. A highly active and stable IrO<sub>x</sub>/SrIrO<sub>3</sub> catalyst for the oxygen  
16 evolution reaction. *Science* **353**, 1011-1014 (2016).
- 17 23. Nong, H. N., Reier, T., Oh, H. S., Gliech, M., Paciok, P., Vu, T. H. T., Teschner, D., Heggen, M.,  
18 Petkov, V., Schlogl, R., Jones, T. & Strasser, P. A unique oxygen ligand environment facilitates water  
19 oxidation in hole-doped IrNiO<sub>x</sub> core-shell electrocatalysts. *Nat. Catal.* **1**, 841-851 (2018).
- 20 24. Grimaud, A., Demortiere, A., Saubanere, M., Dachraoui, W., Duchamp, M., Doublet, M. L. &  
21 Tarascon, J. M. Activation of surface oxygen sites on an iridium-based model catalyst for the oxygen  
22 evolution reaction. *Nat. Energy* **2**, 16189 (2017).
- 23 25. Cheng, Z. F., Huang, B. L., Pi, Y. C., Li, L. G., Shao, Q. & Huang, X. Q. Partially hydroxylated  
24 ultrathin iridium nanosheets as efficient electrocatalysts for water splitting. *Natl. Sci. Rev.* **7**,  
25 1340-1348 (2020).
- 26 26. You, M. S., Gui, L. Q., Ma, X., Wang, Z. B., Xu, Y., Zhang, J., Sun, J., He, B. B. & Zhao, L.  
27 Electronic tuning of SrIrO<sub>3</sub> perovskite nanosheets by sulfur incorporation to induce highly efficient  
28 and long-lasting oxygen evolution in acidic media. *Appl. Catal. B: Environ.* **298**, 120562 (2021).
- 29 27. Xie, Y. H., Long, X., Li, X. W., Chang, C. F., Qu, K. G. & Yang, Z. H. The template synthesis of  
30 ultrathin metallic Ir nanosheets as a robust electrocatalyst for acidic water splitting. *Chem. Commun.*

- 1 **57**, 8620-8623 (2021).
- 2 28. Jiang, B., Kim, J., Guo, Y. N., Wu, K. C. W., Alshehri, S. M., Ahamad, T., Alhokbany, N., Henzie,  
3 J. & Yamachi, Y. Efficient oxygen evolution on mesoporous IrO<sub>x</sub> nanosheets. *Catal. Sci. Technol.* **9**,  
4 3697-3702 (2019).
- 5 29. Lim, J., Park, D., Jeon, S. S., Roh, C. W., Choi, J., Yoon, D., Park, M., Jung, H. & Lee, H.  
6 Ultrathin IrO<sub>2</sub> nanoneedles for electrochemical water oxidation. *Adv. Funct. Mater.* **28**, 1704796  
7 (2018).
- 8 30. Oh, H. S., Nong, H. N., Reier, T., Gliech, M. & Strasser, P. Oxide-supported Ir nanodendrites  
9 with high activity and durability for the oxygen evolution reaction in acid PEM water electrolyzers.  
10 *Chem.Sci.* **6**, 3321-3328 (2015).
- 11 31. Fan, Z. L., Ji, Y. J., Shao, Q., Geng, S. Z., Zhu, W. X., Liu, Y., Liao, F., Hu, Z. W., Chang, Y. C.,  
12 Pao, C. W., Li, Y. Y., Kang, Z. H. & Shao, M. W. Extraordinary acidic oxygen evolution on new  
13 phase 3R-iridium oxide. *Joule* **5**, 3221-3234 (2021).
- 14 32. Chen, Y. B., Li, H. Y., Wang, J. X., Du, Y. H., Xi, S. B., Sun, Y. M., Sherburne, M., Ager, J. M.,  
15 Fisher, A. C. & Xu, Z. C. J. Exceptionally active iridium evolved from a pseudocubic perovskite for  
16 oxygen evolution in acid. *Nat. Commun.* **10**, 572 (2019).
- 17 33. Park, J., Sa, Y. J., Baik, H., Kwon, T., Joo, S. H. & Lee, K. Iridium-based multimetallic  
18 nanoframe@nanoframe structure: an efficient and robust electrocatalyst toward oxygen evolution  
19 reaction. *ACS Nano* **11**, 5500-5509 (2017).
- 20 34. Lebedev, D., Povia, M., Waltar, K., Abdala, P. M., Castelli, I. E., Fabbri, E., Blanco, M. V.,  
21 Fedorov, A., Coperet, C., Marzari, N. & Schmidt, T. J. Highly active and stable iridium pyrochlores  
22 for oxygen evolution reaction. *Chem. Mater.* **29**, 5182-5191 (2017).
- 23 35. Zhang, R. H., Pearce, P. E., Pimenta, V., Cabana, J., Li, H. F., Dalla Corte, D. A., Abakumov, A.  
24 M., Rouse, G., Giaume, D., Deschamps, M. & Grimaud, A. First example of protonation of  
25 ruddlesden–popper Sr<sub>2</sub>IrO<sub>4</sub>: a route to enhanced water oxidation catalysts. *Chem. Mater.* **32**,  
26 3499-3509 (2020).
- 27 36. Chatterjee, S., Peng, X., Intikhab, S., Zeng, G. S., Kariuki, N. N., Myers, D. J., Danilovic, N. &  
28 Snyder, J. Nanoporous iridium nanosheets for polymer electrolyte membrane electrolysis. *Adv.*  
29 *Energy Mater.* **11**, 2101438 (2021).
- 30 37. Wu, G., Zheng, X. S., Cui, P. X., Jiang, H. Y., Wang, X. Q., Qu, Y. T., Chen, W. X., Lin, Y., Li, H.,

- 1 Han, X., Hu, Y. M., Liu, P. G., Zhang, Q. H., Ge, J. J., Yao, Y. C., Sun, R. B., Wu, Y. E., Gu, L., Hong,
- 2 X. & Li, Y. D. A general synthesis approach for amorphous noble metal nanosheets. *Nat. Commun.*
- 3 **10**, 4855 (2019).
